# Supplementary material for: Unbiased screening identifies regulators of cell-cell adhesion and treatment options in pemphigus
Source: PubMed Central journal article supplement (PMC11399147; doi:10.1038/s41467-024-51747-2), 2024-09-14
Supplement: 41467_2024_51747_MOESM1_ESM.pdf [file 41467_2024_51747_MOESM1_ESM.pdf]

a

HaCaT

Reporter transduced

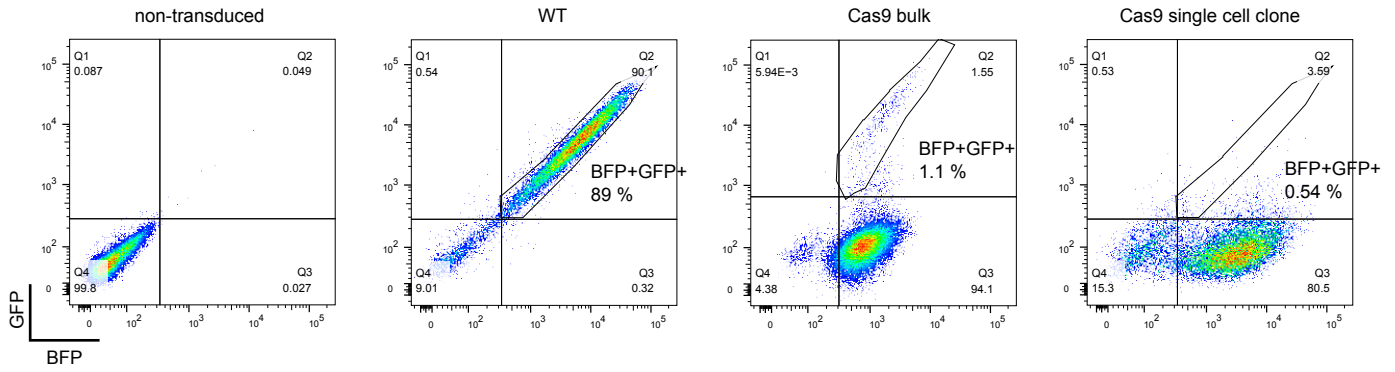

b

| GO-ID | p-value  | corr p-value | Description                                                           | Genes in test set                                                                                                                                |
|-------|----------|--------------|-----------------------------------------------------------------------|--------------------------------------------------------------------------------------------------------------------------------------------------|
| 10467 | 1.63E-05 | 8.49E-03     | gene expression                                                       | PSENE1, ABT1, YARS, ADAR, DDX51, EGFR, HCFC1, MSL1, SYNCRIP, TAF6L, KLF5, SPCS1, EIF3L, TCEB2, EIF3E                                             |
| 16043 | 1.71E-05 | 8.49E-03     | cellular component organization                                       | HDAC3, JUP, PDPK1, AP2A1, AP3B1, LRP3, ARPC4, PTPN11, RBPJ, DYNLL1, ATP2C1, EGFR, MSL1, TAF6L, ATP5B, KLF5, AP2S1, TCEB2, GOPC, GRB2, NF2, ELANE |
| 16192 | 3.05E-05 | 9.80E-03     | vesicle-mediated transport                                            | ATP5B, AP2S1, AP3D1, AP2A1, VPS35, AP3B1, LRP3, GOPC, GRB2, ELANE                                                                                |
| 16044 | 4.83E-05 | 9.80E-03     | cellular membrane organization                                        | ATP5B, AP2S1, AP2A1, AP3B1, LRP3, GRB2, EGFR, ELANE                                                                                              |
| 61024 | 4.92E-05 | 9.80E-03     | membrane organization                                                 | ATP5B, AP2S1, AP2A1, AP3B1, LRP3, GRB2, EGFR, ELANE                                                                                              |
| 10324 | 1.17E-04 | 1.67E-02     | membrane invagination                                                 | ATP5B, AP2A1, AP3B1, LRP3, GRB2, ELANE                                                                                                           |
| 6897  | 1.17E-04 | 1.67E-02     | endocytosis                                                           | ATP5B, AP2A1, AP3B1, LRP3, GRB2, ELANE                                                                                                           |
| 48661 | 1.38E-04 | 1.71E-02     | positive regulation of smooth muscle cell proliferation               | RBPJ, EGFR, ELANE                                                                                                                                |
| 33157 | 1.64E-04 | 1.81E-02     | regulation of intracellular protein transport                         | JUP, PTPN11, GOPC, EGFR                                                                                                                          |
| 70201 | 1.88E-04 | 1.88E-02     | regulation of establishment of protein localization                   | JUP, PDPK1, PTPN11, GOPC, EGFR                                                                                                                   |
| 6139  | 2.48E-04 | 2.24E-02     | nucleobase, nucleoside, nucleotide and nucleic acid metabolic process | ABT1, YARS, UHRF1, REV1, ADAR, DDX51, RBPJ, ATP2C1, HCFC1, MSL1, SYNCRIP, TAF6L, ATP5B, KLF5, TCEB2, EIF3E                                       |

c

HaCaT

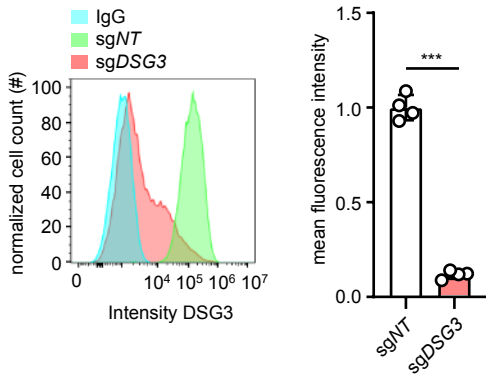

d

HaCaT

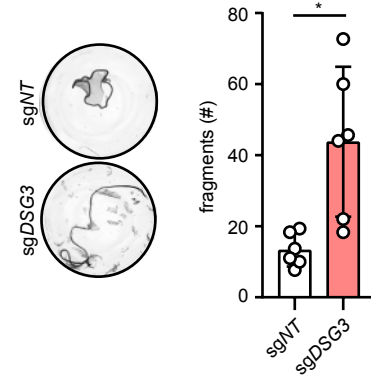

f

HaCaT

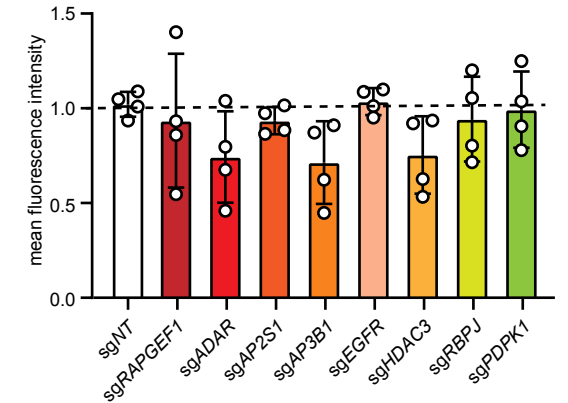

e

HaCaT

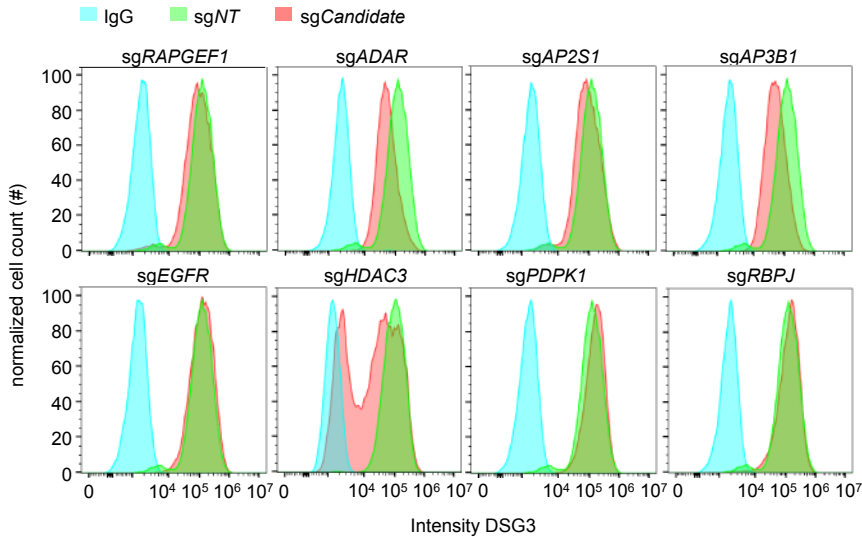

g

HaCaT

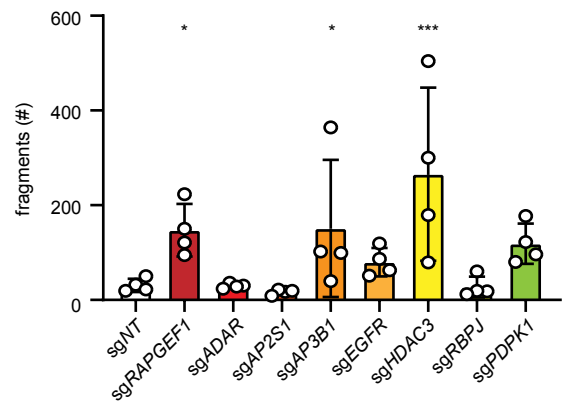

**Supplemental Figure 1:** a) Cas9 editing efficiency measured by flow cytometry of HaCaT cells transduced with pKLV2-U6gRNA5(gGFP)-PGKBFP2AGFP-W. The BFP+GFP-population corresponds to transduced and edited cells. Representative FACS plots are shown. b) GO-biological processes analysis of positive DSG3-regulators using BinGO in Cytoscape 3.10.0. The 10 groups with the most significant p-values are shown. c) Flow cytometry analysis of HaCaT cells stained with DSG3 antibodies or IgG as control. HaCaT cells were transduced with sgNT or sgDSG3. A representative histogram is shown and the mean fluorescence intensity (n=4, p<0.0001) is displayed. d) Fragment numbers counted in dispase-based dissociation assays of HaCaT cells stably transduced with sgNT or sgDSG3 (n=5, p=0.0157). e) Flow cytometry analysis of HaCaT cells stained with DSG3 antibodies or IgG as control. HaCaT cells were transduced with sgNT or sgRNA directed against the indicated candidate gene. A representative histogram is shown and f) the mean fluorescence intensity (n=4) is displayed. g) Fragment numbers counted in dispase-based dissociation assays of HaCaT cells stably transduced with sgNT or sgRNA directed against the indicated candidate gene (n=4, sgNT vs sgRAPGEF1 p=0.0481, sgNT vs sgAP3B1 p=0.0376, sgNT vs sgHDAC3, p=0.0004). Values expressed as mean with standard deviation (mean+/-SD). One n represents one biological replicate. Source data are provided as a Source Data file. Experiments c) and d) were analyzed with two-sided student's t-test; f) and g) were analyzed with One-way-ANOVA, SIDAK correction. p<0.05 \*; p<0.01 \*\*; p<0.001 \*\*\*

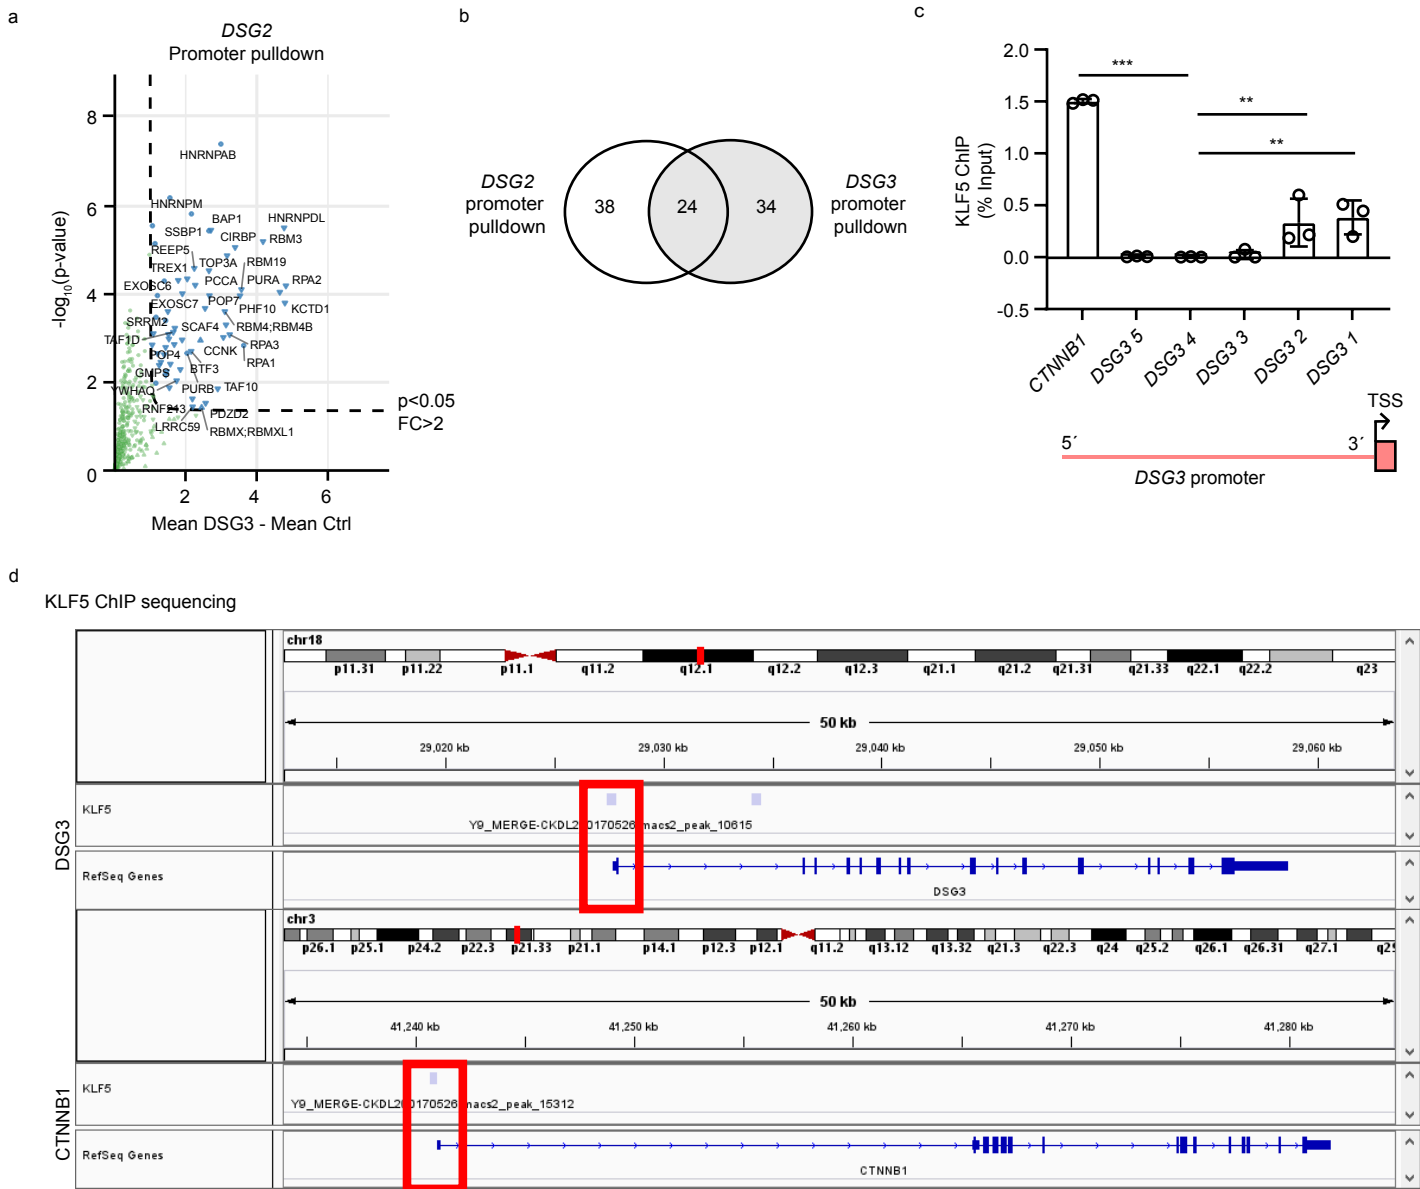

**Supplemental Figure 2:** a) Scatterblot of genes enriched at the DSG2 promoter blotted according to fold change and p-value. b) Overlap of proteins binding to the DSG2 promoter identified by promoter pulldown and proteins binding to the DSG3 promoter identified by promoter pulldown. c) ChIP-qPCR analysis using KLF5 antibodies and primers binding to CTNNB1 or different locations of the DSG3 promoter (n=3, CTNNB1 vs DSG3\_4 p<0.001, DSG3\_1 vs DSG3\_4 p=0.0088, DSG3\_2 vs DSG3\_4 p=0.0028). d) ChIP-sequencing analysis of HaCaT cells (GEO number: GSE168600) with KLF5 antibodies, significant peaks on the DSG3 and CTNNB1 genes are displayed in the IGV browser. Values expressed as mean with standard deviation (mean $\pm$ SD). One n represents one biological replicate. Source data are provided as a Source Data file. Experiment c) was analyzed with One-way-ANOVA, SIDAK correction. p<0.01 \*\*; p<0.001 \*\*\*

a

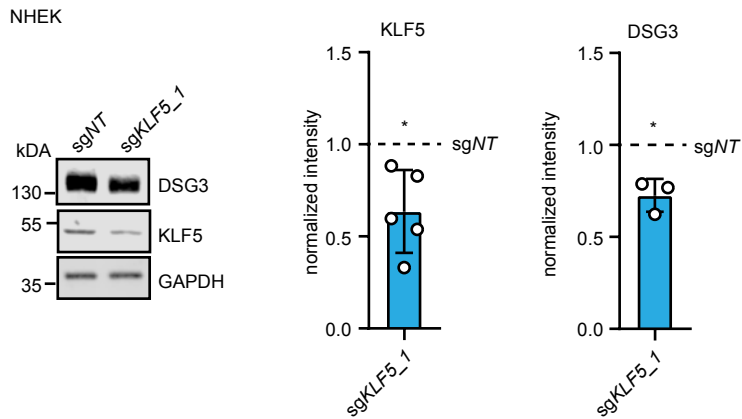

b

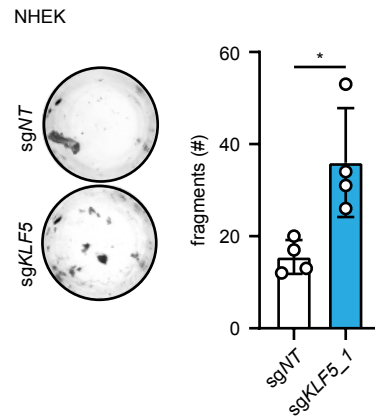

**Supplemental Figure 3:** a) Western blot analysis of NHEK cell lysates using KLF5, DSG3 and GAPDH antibodies. NHEKs were transduced with sgNT or sgKLF5\_1. Representative Western blot images and quantifications of respective proteins are shown (KLF5 n=5 p=0.0224, DSG3 n=3 p=0.0341). b) Dispase-based dissociation assays of NHEK cells stably transduced with sgNT or sgKLF5\_1 plasmids (n=4, p=0.0161). Representative images and number of fragments are shown. Values expressed as mean with standard deviation (mean $\pm$ SD). One n represents one biological replicate. Source data are provided as a Source Data file. Experiment a) was analyzed with two-sided one sample t-test, b) was analyzed with student's t-test. p<0.05 \*

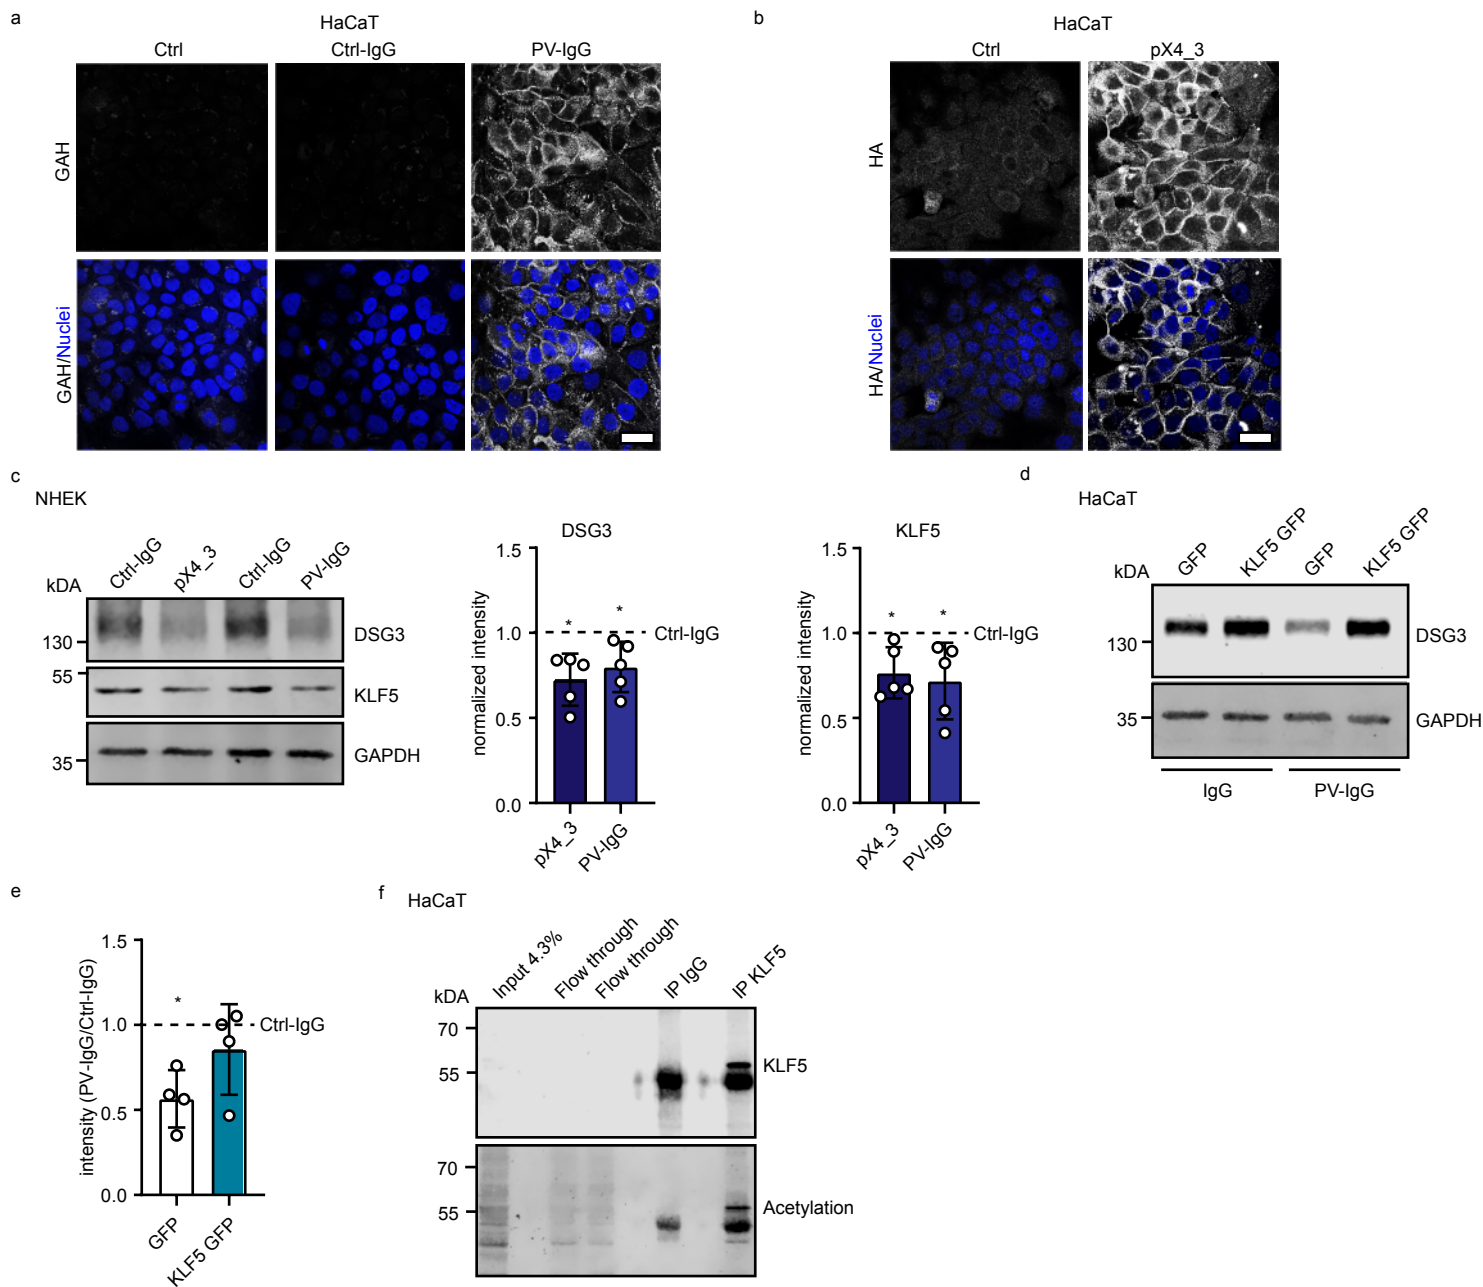

**Supplemental Figure 4:** a) Immunofluorescence staining of HaCaT cells incubated with Ctrl-IgG or PV-IgG for 24h. GAH-Alexa 647 antibodies served to detect bound antibodies, DAPI to visualize nuclei. Scale bar = 10  $\mu$ m. b) Immunofluorescence staining of HaCaT cells incubated with Ctrl-IgG or pX4\_3. GAH-Alexa647 and a HA antibody (secondary antibody Goat-anti-mouse 568) were used to detect Ctrl-IgG and pX4\_3, respectively. DAPI served to visualize nuclei. Scale bar = 10  $\mu$ m. c) Western blot analysis of NHEK cell lysates using KLF5, DSG3 and GAPDH antibodies. NHEKs were treated with Ctrl-IgG, pX4\_3 or PV-IgG. Representative Western blot images and quantifications of respective proteins are shown (n=5, DSG3 pX4\_3 p=0.0159, DSG3 PV-IgG p=0.0396, KLF5 pX4\_3 p=0.0256, KLF5 PV-IgG p=0.0492). d) Western blot analysis of HaCaT cells stably transduced with KLF5-GFP or GFP as control and treated with IgG or PV-IgG. Antibodies against DSG3 or GAPDH were used (n=4). e) Quantification of Western blot shown in d) (n=4, GFP p=0.0141). f) Immunoprecipitation analysis to identify KLF5 acetylation. KLF5 was immunoprecipitated using KLF5 antibodies and the acetylation was visualized using a pan-acetylation antibody. Immunoprecipitation with Ctrl-IgGs served as control. Values expressed as mean with standard deviation (mean $\pm$ SD). One n represents one biological replicate. Source data are provided as a Source Data file. Experiments c), e) were analyzed with two-sided one sample t-test. p<0.05 \*

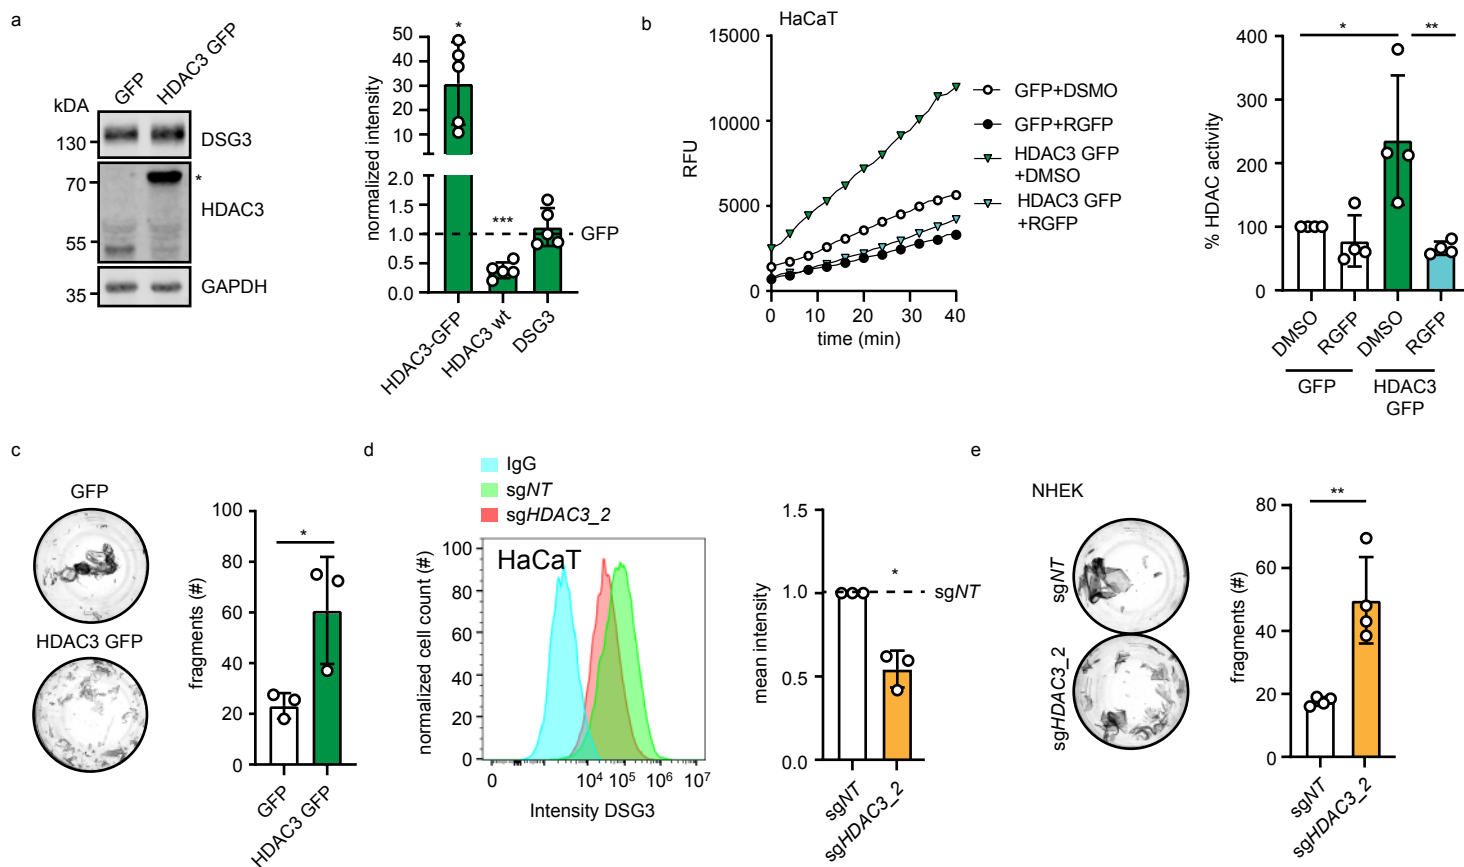

**Supplemental Figure 5:** a) Western blot analysis of HaCaT cell lysates stably expressing HDAC3-GFP using HDAC3, DSG3 and GAPDH antibodies. Representative Western blot images and quantifications of respective proteins (n=5, HDAC3-GFP p=0.0170, HDAC3 wt p=0.0005) are shown. Values were normalized to Ctrl. Asterisk marks HDAC3-GFP. b) HDAC activity assay with HaCaT cell lysates. HaCaT cells were stably transduced with HDAC3 overexpression plasmid and treated with DMSO or 5  $\mu$ M RGFP966. Two different presentations are shown. The left panel shows the increase in deacetylated peptide detected by its fluorophore over time of one representative experiment and the right panel shows the calculated HDAC activity (n=4, GFP DMSO vs HDAC3-GFP DMSO p=0.0129, HDAC3-GFP DMSO vs HDAC3 GFP RGFP966 p=0.0027). RFU relative fluorescence unit. c) Dispase-based dissociation assay of HaCaT cells stably transduced with HDAC3-GFP (n=3, p=0.0398). Representative images and number of fragments are shown. d) Flow cytometry analysis of HaCaT cells stained with DSG3 antibodies or IgG as control. HaCaT cells were stably transduced with sgNT or sgHDAC3 plasmids. One representative histogram and quantification (n=3, p=0.0191) are shown. e) Dispase-based dissociation assays of NHEK cells stably transduced with sgNT or sgHDAC3\_2 plasmids (n=4, p=0.0037). Representative images and number of fragments are shown. Values expressed as mean with standard deviation (mean $\pm$ SD). One n represents one biological replicate. Source data are provided as a Source Data file. Experiments a) and d) were analyzed with two-sided one sample t-test, c) and e) were analyzed with two-sided Student's t-test, b) was analyzed with One-way-ANOVA, SIDAK correction. p<0.05 \*; p<0.01 \*\*

a

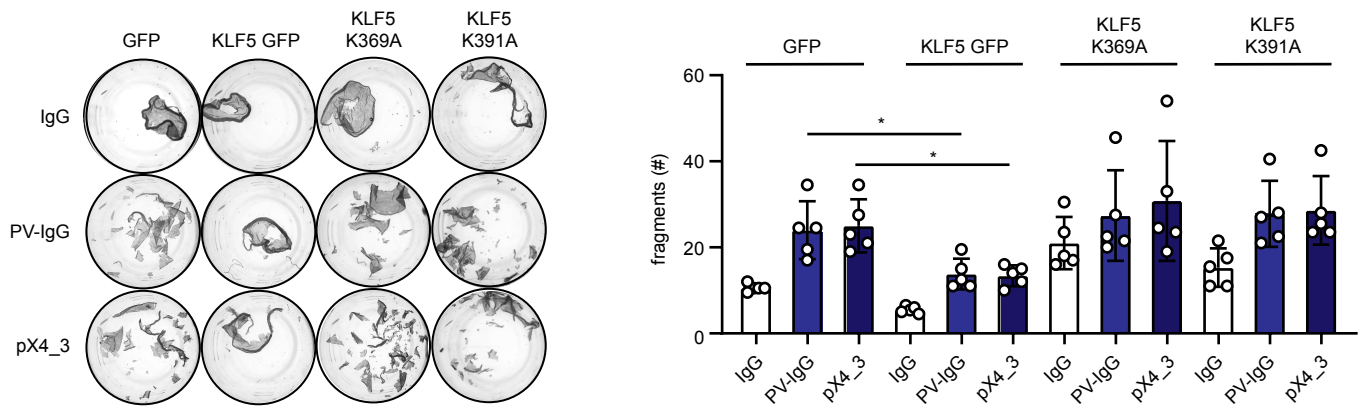

b

HDAC3 ChIP sequencing

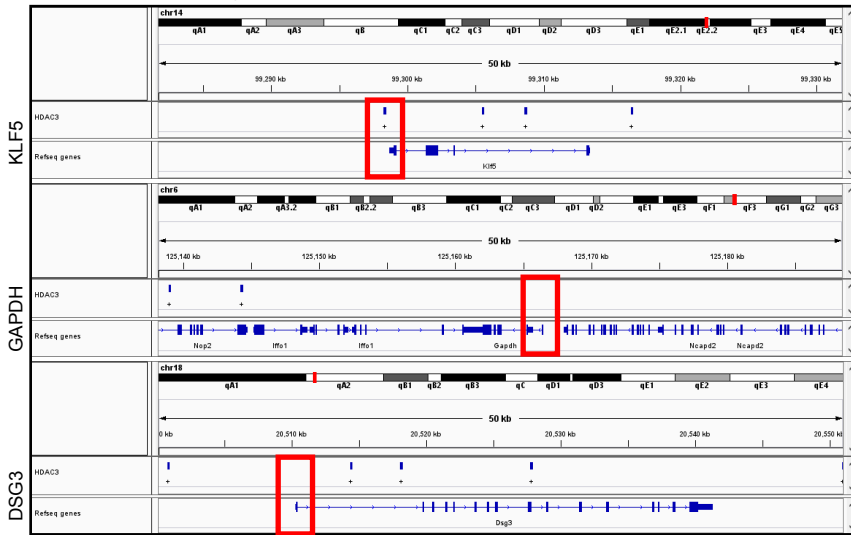

c

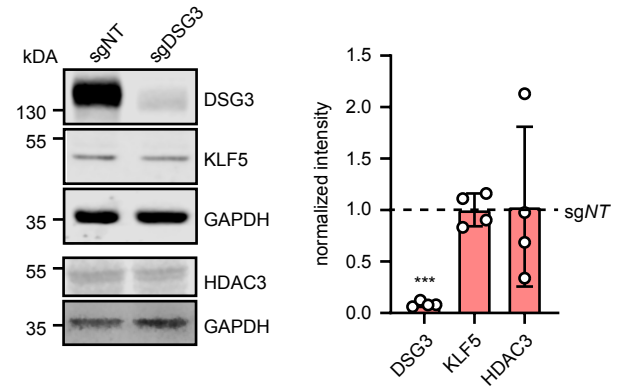

d

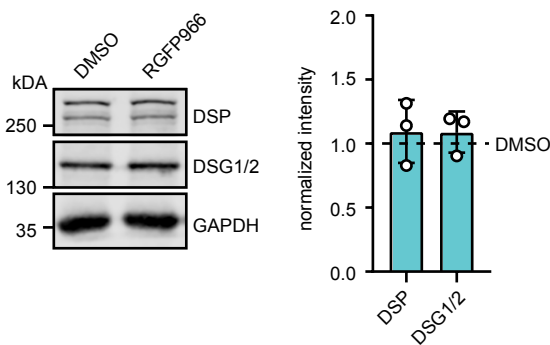

**Supplemental Figure 6:** a) Disperse-based dissociation assays of HaCaT cells stably transfected with KLF5, KLF5 K369A, KLF5 K391A sgKLF5\_1 or GFP as control and treated with Ctrl-IgG, PV-IgG or pX4\_3. Representative images and quantifications of  $n=5$  (GFP PV-IgG vs KLF5 GFP PV-IgG  $p=0.0255$ , GFP pX4\_3 vs KLF5 GFP pX4\_3  $p=0.0117$ ) are shown. b) HDAC3 ChIP-sequencing of mouse epidermis E18.5 dataset number (GEO number: GSE137232), KLF5, GAPDH, DSG3 gene loci are shown. c) Western blot analysis of HaCaT cells stably transduced with sgNT or sgDSG3. Antibodies against DSG3, KLF5, HDAC3 and GAPDH were used. Values were normalized to sgNT ( $n=4$ , DSG3  $p<0.0001$ ). d) Western blot analysis of HaCaT cells treated with DMSO or 5  $\mu\text{M}$  RGFP966. Antibodies against DSP, DSG1/2 and GAPDH were used. Values were normalized to DMSO ( $n=4$ ). Values expressed as mean with standard deviation (mean $\pm$ SD). One  $n$  represents one biological replicate. Source data are provided as a Source Data file. Experiment a) was analyzed with One-way-ANOVA, SIDAK correction. c) was analyzed with one sample t-test.  $p<0.05$  \*;  $p<0.001$  \*\*\*

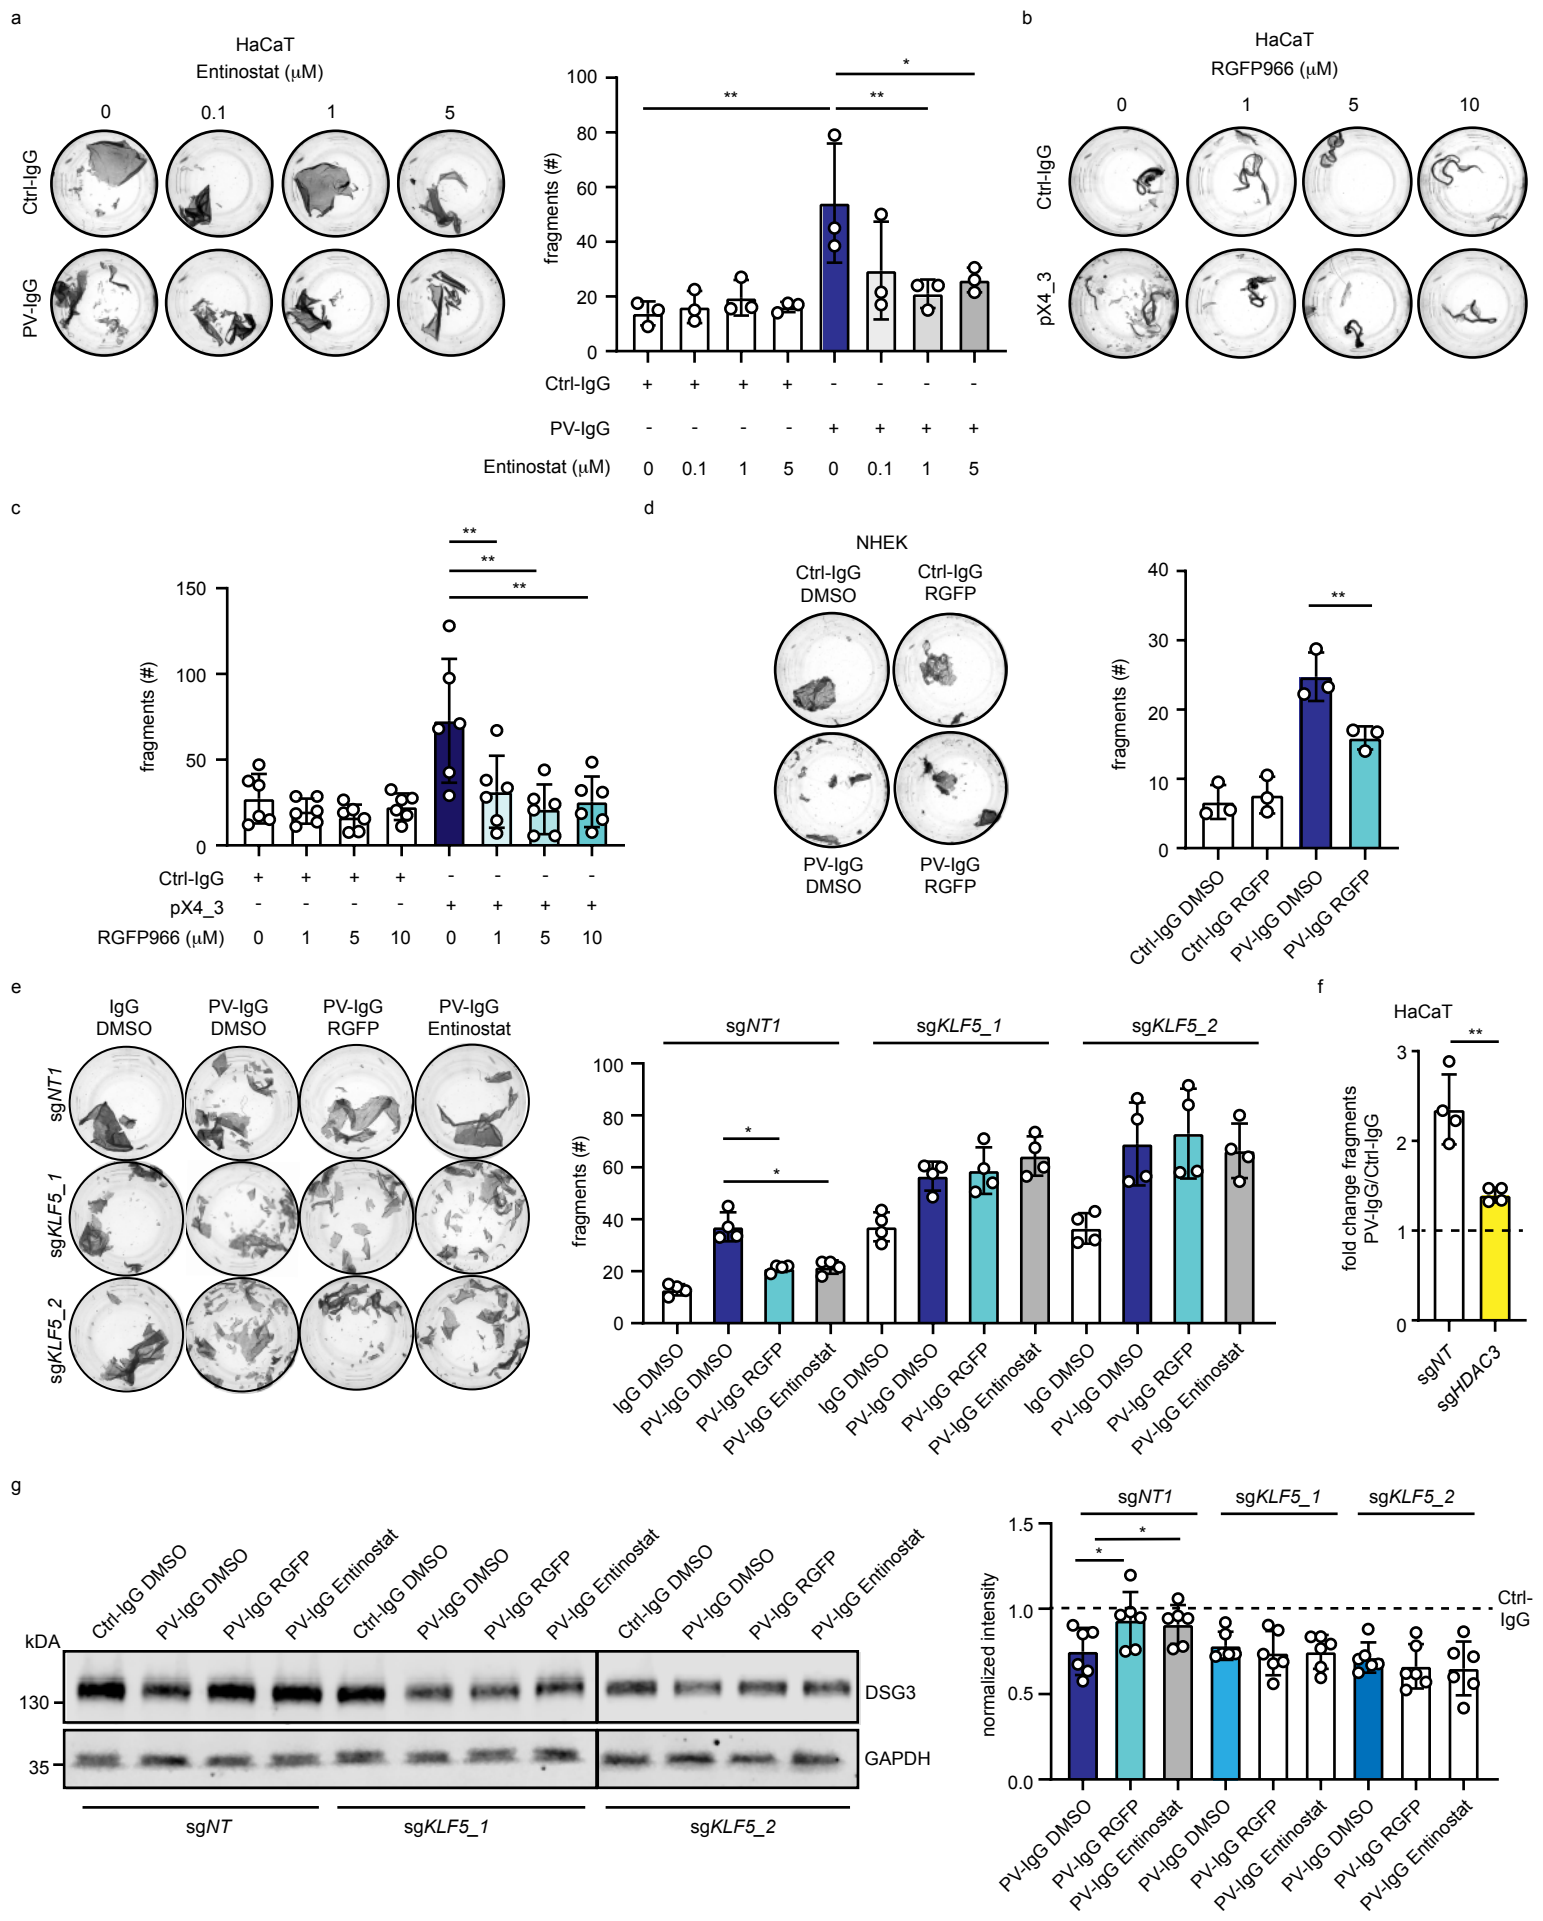



**Supplemental Figure 7:** a) Dispase-based dissociation assays of HaCaT cells treated with Ctrl-IgG or PV-IgG and indicated concentrations of the HDAC1/3 inhibitor Entinostat. Representative images and quantifications of (n=3, Ctrl-IgG vs PV-IgG p=0.013, PV-IgG vs PV-IgG 1  $\mu$ M Entinostat p=0.0070, PV-IgG vs PV-IgG 5  $\mu$ M Entinostat p=0.229) are shown. b) Dispase-based dissociation assays of HaCaT cells treated with Ctrl-IgG or pX4\_3 and indicated concentrations of HDAC3 inhibitor RGFP966. Representative images and quantifications c) of n=6 (pX4\_3 vs pX4\_3 1  $\mu$ M RGFP966 p=0.098, pX4\_3 vs pX4\_3 5  $\mu$ M RGFP966 p=0.0027, pX4\_3 vs pX4\_3 10  $\mu$ M RGFP966 p=0.0054) are shown. d) Dispase-based dissociation assays of NHEK cells treated with Ctrl-IgG or PV-IgG and 5  $\mu$ M RGFP966 (n=3, PV-IgG DMSO vs PV-IgG RGFP966 p=0.0035). Representative images and number of fragments are shown. e) Dispase-based dissociation assays of HaCaT cells stably transfected with sgNT1, sgKLF5\_1 or sgKLF5\_2 and treated with Ctrl-IgG or PV-IgG and DMSO, 5  $\mu$ M RGFP966 or 10  $\mu$ M Entinostat. Representative images and quantifications of (n=4, sgNT PV-IgG DMSO vs sgNT PV-IgG RGFP966 p=0.0301, sgNT PV-IgG DMSO vs sgNT PV-IgG Entinostat p=0.0364) are shown. f) Dispase-based dissociation assays of HaCaT cells stably transfected with sgNT or sgHDAC3\_1 plasmid. The cells were treated for 24h with Ctrl-IgG or PV-IgG. Fold change of fragments vs. Ctrl-IgG is shown (n=4, p=0.0030). g) Western blot analysis of HaCaT cells stably transfected with sgNT1, sgKLF5\_1 or sgKLF5\_2 and treated with Ctrl-IgG or PV-IgG and DMSO, 5  $\mu$ M RGFP966 or 10  $\mu$ M Entinostat using antibodies against DSG3 and GAPDH. Representative images and quantifications are shown (n=6, sgNT PV-IgG DMSO vs sgNT PV-IgG RGFP966 p=0.0154, sgNT PV-IgG DMSO vs sgNT PV-IgG Entinostat p=0.0353). Values expressed as mean with standard deviation (mean $\pm$ SD). One n represents one biological replicate. Source data are provided as a Source Data file. Experiments a-e) and g) were analyzed with One-way-ANOVA, SIDAK correction. f) was analyzed with two-sided Student's t-test, p<0.05 \*; p<0.01 \*\*

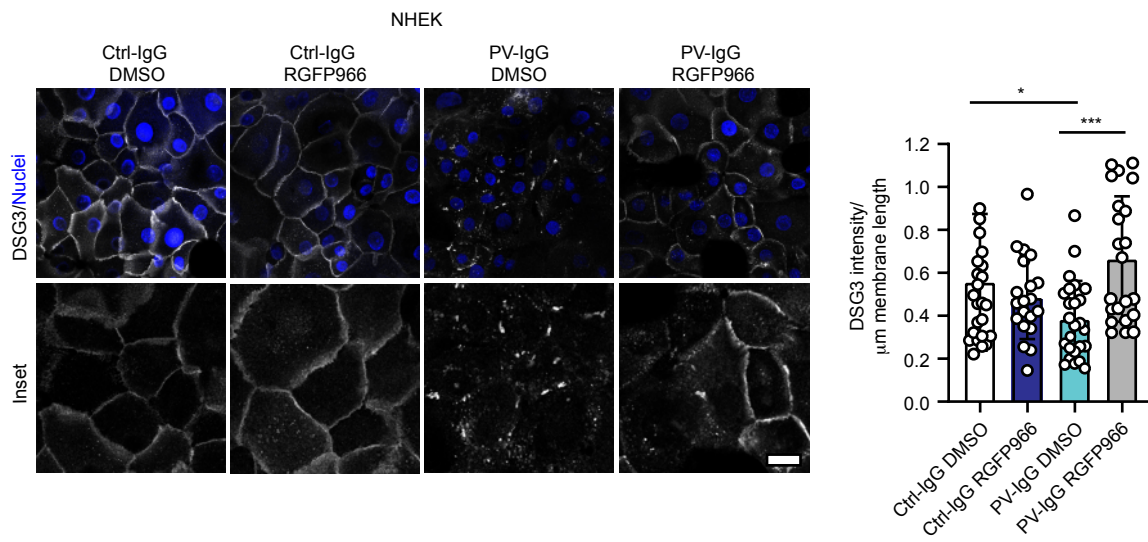

**Supplemental Figure 8:** Immunofluorescence staining of NHEK cells treated with Ctrl-IgG or PV-IgG and DMSO, 5  $\mu\text{M}$  RGFP966 or 10  $\mu\text{M}$  Entinostat using DSG3 antibodies and DAPI. Scale bar = 10  $\mu\text{m}$ . Quantification of DSG3 intensity/membrane length of  $n=3$  (Ctrl-IgG DMSO vs Ctrl-IgG RGFP966  $p=0.0491$ , PV-IgG DMSO vs PV-IgG RGFP966  $p=0.0008$ ) is shown. Values expressed as mean with standard deviation (mean $\pm$ SD). One  $n$  represents one biological replicate. Source data are provided as a Source Data file. One-way-ANOVA, SIDAK correction.  $p<0.05$  \*;  $p<0.001$  \*\*\*

a

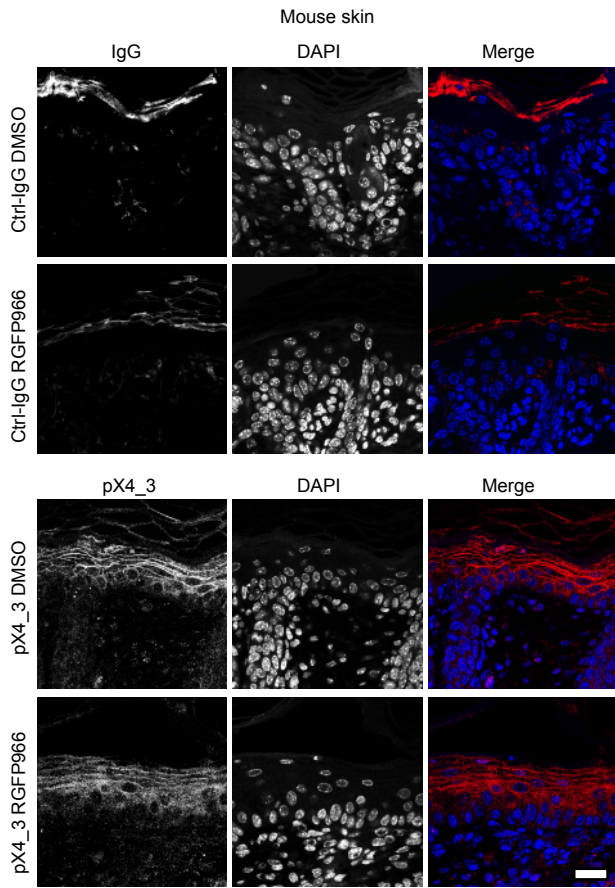

b

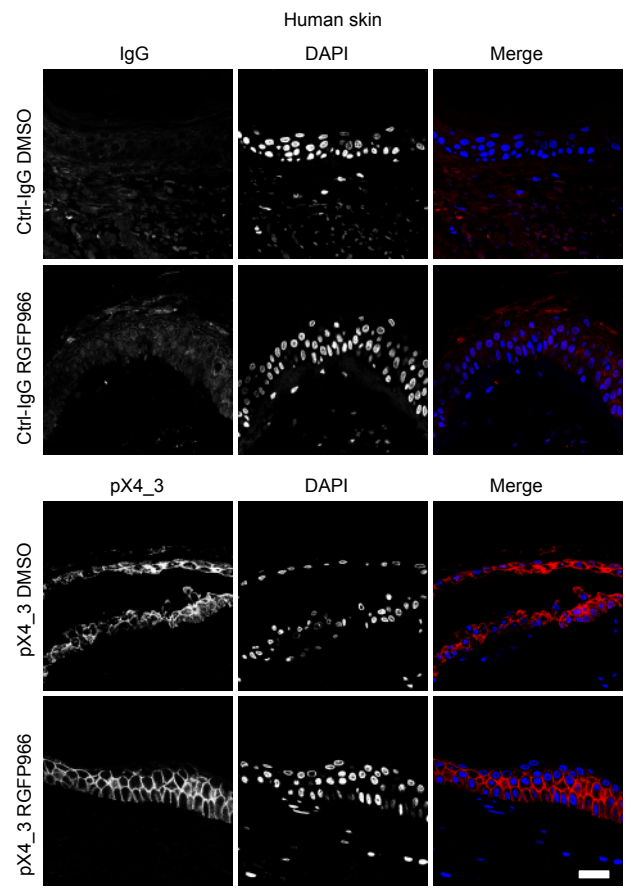

c

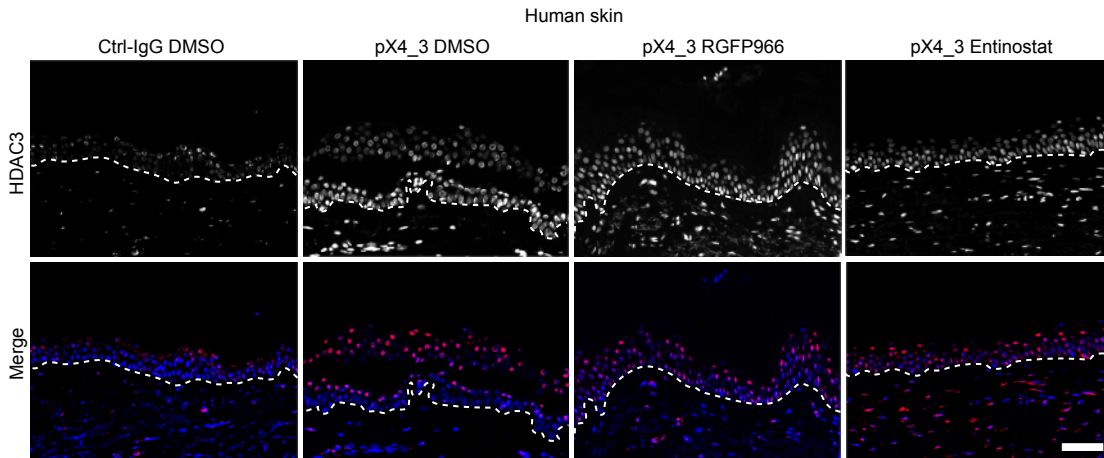

d

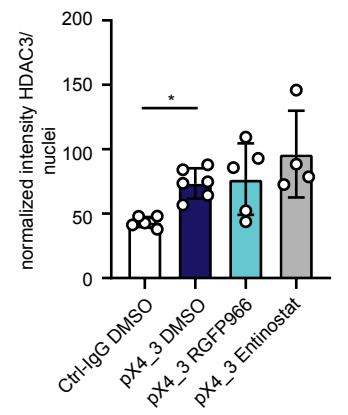

e

human skin - HDAC3 inhibition after antibody application

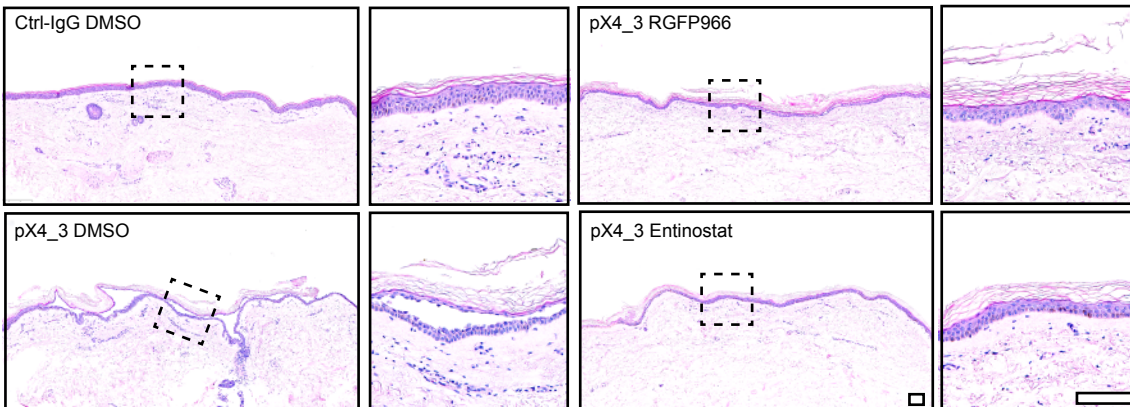

f

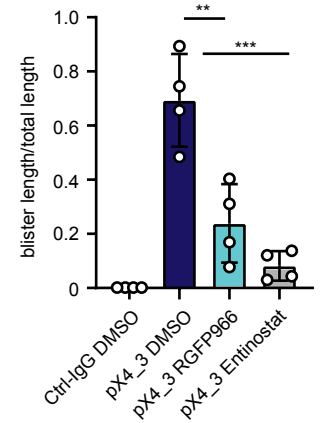

**Supplemental Figure 9:** a) Immunofluorescence staining of mouse skin sections incubated with Ctrl-IgG or pX4\_3 and DMSO or 5  $\mu$ M RGFP966. GAH-Alexa647 was used to detect Ctrl-IgG, HA antibodies (secondary antibody Goat-anti-mouse 568) were applied to visualize bound pX4\_3. DAPI served to stain nuclei. Scale bar = 100  $\mu$ m. b) Immunofluorescence staining of human skin sections treated with Ctrl-IgG or pX4\_3 and DMSO or 5  $\mu$ M RGFP966. GAH-Alexa647 was used to detect Ctrl-IgG, HA antibodies (secondary antibody Goat-anti-mouse 568) were applied to visualize bound pX4\_3. DAPI served to stain nuclei. Representative images are shown. Scale bar = 100  $\mu$ m. c) Immunofluorescence staining of human skin sections incubated with Ctrl-IgG or pX4\_3 and DMSO or 5  $\mu$ M RGFP966. HDAC3 antibodies (secondary antibody Goat-anti-mouse 568) were applied. DAPI served to stain nuclei. Scale bar = 100  $\mu$ m d) Quantification of c) displaying the normalized HDAC3 intensity per nucleus (Ctrl-IgG DMSO n=5, pX4\_3 DMSO n=6, pX4\_3 RGFP966 n=5, pX4\_3 Entinostat n=4, Ctrl-IgG vs pX4\_3 DMSO p=0.0431). e) Ex-vivo skin model: H&E staining of human skin treated with Ctrl-IgG or pX4\_3 and after 2h of incubation at 37°C treated with DMSO/ 5  $\mu$ M RGFP966 or 10  $\mu$ M Entinostat is displayed. Scale bar = 100  $\mu$ m f) Quantification of blister length versus total section length is shown (n=4, pX4\_3 DMSO vs pX4\_3 RGFP966 p=0.0019, pX4\_3 DMSO vs pX4\_3 Entinostat p=0.002). Values expressed as mean with standard deviation (mean+/-SD). One n represents one biological replicate. Source data are provided as a Source Data file. Experiments d) and f) were analyzed with One-way-ANOVA, SIDAK correction. p<0.05 \*; p<0.01 \*\*; p<0.001 \*\*\*

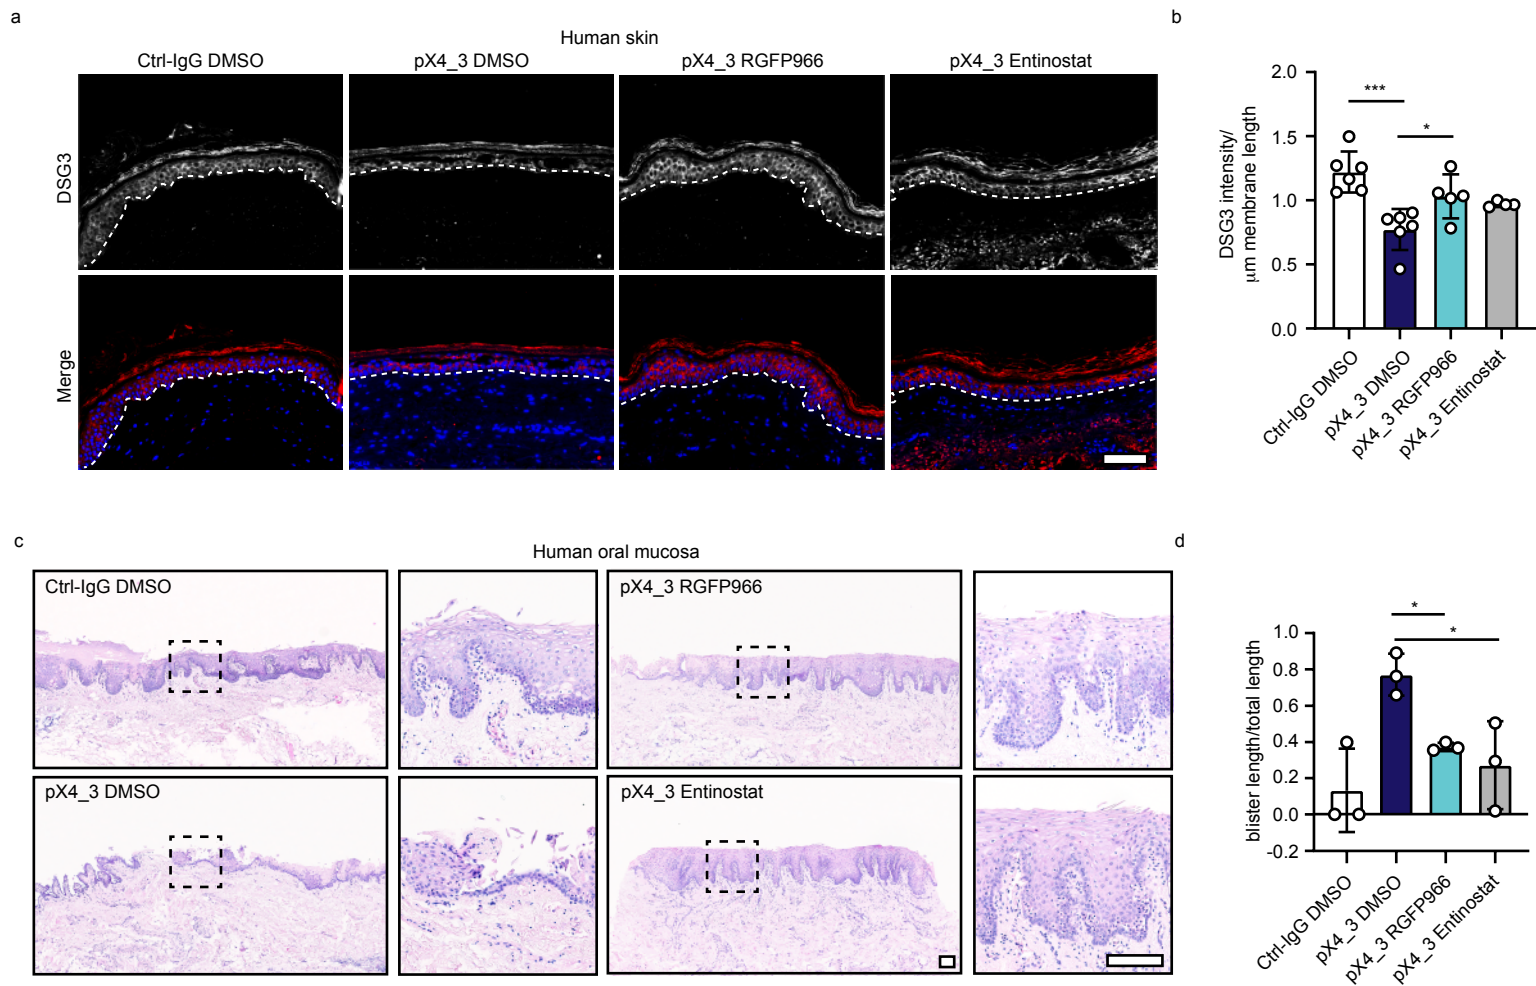

**Supplemental Figure 10:** a) Immunofluorescence staining of human skin sections incubated with Ctrl-IgG or pX4\_3 and DMSO or 5 μM RGFP966. DSG3 antibodies (secondary antibody Goat-anti-mouse 568) were applied. DAPI served to stain nuclei. Scale bar = 100 μm b) Quantification of a) displaying the DSG3 intensity per μm membrane length (Ctrl-IgG n=6, pX4\_3 DMSO n=6, pX4\_3 RGFP966 n=6, pX4\_3 Entinostat n=4, Ctrl-IgG DMSO vs pX4\_3 DMSO p=0.0002, pX4\_3 DMSO vs pX4\_3 RGFP966 p=0.0314). c) Ex-vivo mucosa model: H&E staining of human oral mucosa treated with Ctrl-IgG or pX4\_3 and DMSO/ 5 μM RGFP966 or 10 μM Entinostat is displayed. Scale bar = 100 μm. d) Quantification of blister length versus total section length is shown (n=3, pX4\_3 DMSO vs pX4\_3 RGFP966 p=0.0496, pX4\_3 DMSO vs pX4\_3 Entinostat p=0.0175). Source data are provided as a Source Data file. Experiments b) and d) were analyzed with One-way-ANOVA, SIDAK correction. p<0.05 \*; p<0.01 \*\*

| id       | neg_fc   | pos_fdr  |
|----------|----------|----------|
| ARPC4    | 3.9553   | 0.00165  |
| AP2S1    | 5.5102   | 0.00165  |
| DSG3     | 5.2166   | 0.00165  |
| NF2      | 3.9448   | 0.003713 |
| EGFR     | 5.4117   | 0.00495  |
| CMTR1    | 4.6481   | 0.007426 |
| AP3B1    | 3.8373   | 0.011757 |
| KLF5     | 4.3182   | 0.011757 |
| RNF146   | 2.7636   | 0.012651 |
| SHOC2    | 2.871    | 0.053694 |
| ATP2C1   | 2.7762   | 0.053694 |
| RHBDL1   | 2.8959   | 0.053694 |
| SYNCRIP  | 2.7847   | 0.053694 |
| ACACA    | 3.0057   | 0.066832 |
| FAM103A1 | 5.1385   | 0.068379 |
| C18orf8  | 2.1805   | 0.068379 |
| RBPJ     | 2.9654   | 0.078334 |
| PDPK1    | 4.4807   | 0.078658 |
| EIF3L    | 3.8125   | 0.082583 |
| BUD13    | 3.9491   | 0.082583 |
| GOPC     | 3.0091   | 0.082583 |
| HCFC1    | 3.0327   | 0.082583 |
| OR51E2   | -0.99106 | 0.088033 |
| GRB2     | 3.5158   | 0.093853 |
| PSENEN   | 2.5645   | 0.09604  |
| RALGAPB  | 2.0945   | 0.10066  |
| JUP      | 1.74     | 0.10066  |
| UHRF1    | 3.2828   | 0.102016 |
| THAP1    | 4.7987   | 0.106692 |
| ATP5B    | 3.2855   | 0.114026 |
| PRRT2    | 2.3693   | 0.123762 |
| YARS     | 4.0844   | 0.14836  |
| REV1     | 3.7827   | 0.155266 |
| LRP3     | 3.5426   | 0.158014 |
| ASNA1    | 2.4176   | 0.158014 |
| ADAR     | 1.8122   | 0.158014 |
| DYNLL1   | 2.4019   | 0.158014 |
| AP2A1    | 3.6686   | 0.164018 |
| EIF3E    | 2.9876   | 0.167936 |
| DDX51    | 2.1814   | 0.173267 |
| HDAC3    | 3.0909   | 0.173267 |
| AMD1     | 3.7205   | 0.173267 |
| OSBPL9   | 3.0723   | 0.173267 |
| TCEB2    | 2.1425   | 0.173267 |
| PTPN11   | 3.6671   | 0.173267 |
| VPS35    | 2.111    | 0.173267 |

|          |        |          |
|----------|--------|----------|
| ELANE    | 0.4664 | 0.173267 |
| TAF6L    | 1.4917 | 0.184455 |
| SPCS1    | 2.8643 | 0.184455 |
| AP3D1    | 2.6205 | 0.184455 |
| MSL1     | 3.1478 | 0.193511 |
| NFATC2IP | 2.1921 | 0.193511 |
| UBE2K    | 3.2026 | 0.193511 |
| FCHO2    | 2.4606 | 0.193511 |
| ABT1     | 2.5589 | 0.193511 |
| ZNF286A  | 3.1434 | 0.193511 |

**Supplementary Table 1:** Putative positive regulators of DSG3 identified by CRISPR/Cas9 sgRNA library screening. Gene name, fold change and false discovery rate calculated using MAGeCK are displayed.

| Gene.names        | difference_Dsg3_control | pvalue_Dsg3_control |
|-------------------|-------------------------|---------------------|
| RECQL             | 2.413126226             | 1.01E-08            |
| HNRNPU            | 2.27298905              | 8.36E-08            |
| SNRPA             | 2.957743483             | 2.35E-07            |
| RPA2              | 3.328007594             | 1.84E-06            |
| KLF5              | 3.867606607             | 2.23E-06            |
| C5orf24           | 2.610612423             | 2.36E-06            |
| HNRNPDL           | 4.411822249             | 2.40E-06            |
| PNKP              | 1.250201498             | 1.79E-05            |
| RBM14             | 4.563278673             | 1.84E-05            |
| PURA              | 4.273307523             | 1.92E-05            |
| TFG               | 4.345233953             | 2.02E-05            |
| SSBP1             | 1.578867556             | 2.30E-05            |
| TAF15             | 4.357941564             | 2.55E-05            |
| TOP3A             | 2.780121566             | 2.63E-05            |
| HNRNPA3           | 2.723586621             | 3.94E-05            |
| LRRC59            | 3.001649146             | 5.03E-05            |
| HNRNPM            | 1.289179435             | 5.27E-05            |
| APOBEC3C          | 1.129300343             | 6.58E-05            |
| HNRNPAB           | 1.871597676             | 7.57E-05            |
| HNRNPA0           | 1.168710402             | 8.25E-05            |
| HNRNPUL2          | 2.26652583              | 9.68E-05            |
| HNRNPA2B1         | 2.058903964             | 0.000122612         |
| MYL6              | 1.585873079             | 0.000134425         |
| TREX1             | 2.276283354             | 0.000156838         |
| RBM4;RBM4B        | 1.889639939             | 0.00017215          |
| FAM120A           | 6.24815391              | 0.00018127          |
| PHF10             | 3.121668126             | 0.000207259         |
| KCTD1             | 4.114620268             | 0.000229114         |
| HNRNPUL1          | 1.105832488             | 0.000356252         |
| FOSL1             | 2.684540776             | 0.000478254         |
| IGF2BP3           | 1.296282011             | 0.000528347         |
| PRPF31            | 1.300414729             | 0.000637683         |
| POP4              | 1.368762823             | 0.000654675         |
| HNRNPA1;HNRNPA1L2 | 1.658097109             | 0.000660846         |
| PCCA              | 2.310543037             | 0.000664104         |
| ZNF362            | 1.363742032             | 0.000730627         |
| MBNL1;MBLL;MBNL2  | 1.527691944             | 0.000731441         |
| APOBEC3B          | 2.602608391             | 0.0007938           |
| SCAF4             | 3.043807721             | 0.000840745         |
| POLB              | 4.996980607             | 0.001221146         |
| ZNF512B           | 1.263948847             | 0.001447336         |
| EWSR1             | 3.947721973             | 0.00256576          |
| TCF7L2            | 1.390263089             | 0.003260633         |
| FMR1              | 2.658846642             | 0.003331362         |
| DDX3X;DDX3Y       | 1.152450634             | 0.003348867         |
| RUNX1             | 1.255463857             | 0.003819507         |
| HNRNPK            | 1.18291548              | 0.003869622         |
| TCF20             | 1.077084018             | 0.004160622         |



|             |             |             |
|-------------|-------------|-------------|
| RBMX;RBMXL1 | 4.817836097 | 0.005783032 |
| RMI1        | 1.424904639 | 0.006001566 |
| FUS         | 1.517851604 | 0.006567697 |
| PDS5A;PDS5B | 1.335595597 | 0.006772364 |
| CD2BP2      | 1.609465929 | 0.006884864 |
| YWHAQ       | 1.636474797 | 0.00725385  |
| RPA1        | 1.469317078 | 0.016627644 |
| IGHMBP2     | 1.776833826 | 0.026980652 |
| HMG20B      | 1.526109457 | 0.03239257  |
| PPL         | 4.947517984 | 0.044159035 |

**Supplementary Table 2:** Putative binders of the DSG3 promoter identified by promoter pulldown followed by mass spectrometry, fold change and p-value are displayed. The putative binders were identified using two-sided Welch-Test.

| Gene.names                     | difference_Dsg2_control | pvalue_Dsg2_control |
|--------------------------------|-------------------------|---------------------|
| HNRNPAB                        | 2.989246736             | 3.86E-08            |
| HNRNPA0                        | 1.556165942             | 6.44E-07            |
| HNRNPM                         | 2.161430548             | 1.49E-06            |
| PDCD11                         | 1.064040942             | 2.78E-06            |
| HNRNPDL                        | 4.767523499             | 3.09E-06            |
| BAP1                           | 2.709821543             | 3.48E-06            |
| SSBP1                          | 2.652948293             | 3.63E-06            |
| RBM3                           | 4.174619278             | 6.32E-06            |
| BLM                            | 1.137069888             | 7.07E-06            |
| CIRBP                          | 3.389542958             | 8.59E-06            |
| TOP3A                          | 3.163113132             | 1.32E-05            |
| REEP5                          | 2.24094676              | 2.57E-05            |
| PCCA                           | 2.654090445             | 2.91E-05            |
| TREX1                          | 2.043100062             | 4.45E-05            |
| EXOSC6                         | 1.78876786              | 4.81E-05            |
| PELP1                          | 1.397486474             | 5.02E-05            |
| LGALS1                         | 2.267802178             | 6.19E-05            |
| RPA2                           | 4.818090291             | 6.40E-05            |
| RBM19                          | 3.566799172             | 7.81E-05            |
| PURA                           | 4.646673825             | 8.94E-05            |
| C17orf49;BAP18;RNASEK-C17orf49 | 1.905507                | 9.66E-05            |
| ERI1                           | 1.204466955             | 0.000107246         |
| POP7                           | 2.667553561             | 0.000107392         |
| PHF10                          | 3.527344385             | 0.000107943         |
| KCTD1                          | 4.789936858             | 0.000157204         |
| EXOSC7                         | 2.544726317             | 0.00020839          |
| DIDO1                          | 1.498410537             | 0.000246265         |
| RBM4;RBM4B                     | 3.100036213             | 0.000246306         |
| RBM28                          | 1.165418869             | 0.000333318         |
| SRSF7                          | 1.436109938             | 0.000397243         |
| SCAF4                          | 3.13314622              | 0.000494602         |
| SRRM2                          | 1.693387652             | 0.000587667         |
| TAF1D                          | 1.65007595              | 0.000726518         |
| WASF2                          | 1.089830711             | 0.00078081          |
| PABPC4                         | 1.515056038             | 0.000814476         |
| RPA3                           | 3.236781334             | 0.000823869         |
| CCNK                           | 3.059320374             | 0.000953756         |
| HMGXB4                         | 1.526084981             | 0.001032843         |
| RMI1                           | 1.899180633             | 0.001086773         |
| RBM14                          | 2.414576882             | 0.001115679         |
| POP4                           | 1.678031844             | 0.001379555         |
| WDR82                          | 1.056783076             | 0.001412727         |
| RPA1                           | 3.631130988             | 0.001460378         |
| POLR2H                         | 1.434687862             | 0.001605603         |
| BTF3                           | 2.153494074             | 0.001971554         |
| PURB                           | 2.039802124             | 0.002185862         |
| PRPF31                         | 1.210461886             | 0.002222            |
| TCF7L2                         | 1.394364624             | 0.002352731         |

|             |             |             |
|-------------|-------------|-------------|
| CLIC1       | 1.298860851 | 0.003491713 |
| ASPH        | 1.568086543 | 0.003857263 |
| ARF6        | 1.254187881 | 0.004100422 |
| GMPS        | 1.848398481 | 0.005106305 |
| PDS5A;PDS5B | 1.46434627  | 0.005684908 |
| CDK13       | 1.440739013 | 0.006724652 |
| YWHAQ       | 1.744095347 | 0.009200404 |
| RPL12       | 1.160119802 | 0.010512706 |
| TAF8        | 1.539796059 | 0.013261826 |
| TAF10       | 2.900203254 | 0.014028763 |
| RNF213      | 2.187961561 | 0.023757696 |
| PDZD2       | 2.559478908 | 0.029779191 |
| LRRC59      | 2.193919801 | 0.036040691 |
| RBMX;RBMXL1 | 2.44775552  | 0.037624643 |

**Supplementary Table 3:** Putative binders of the DSG2 promoter identified by promoter pulldown followed by mass spectrometry, fold change and p-value are displayed. The putative binders were identified using two-sided Welch-test.

| Sample | Localisation | Category           | Gender (m/f) | anti-DSG3 | anti-DSG1 |
|--------|--------------|--------------------|--------------|-----------|-----------|
| 1      | skin         | Ctrl               | f            | na        | na        |
| 2      | skin         | Ctrl               | m            | na        | na        |
| 3      | skin         | Ctrl               | f            | na        | na        |
| 4      | skin         | Ctrl               | f            | na        | na        |
| 5      | skin         | Ctrl               | f            | na        | na        |
| 6      | skin         | Ctrl               | f            | na        | na        |
| 7      | skin         | Ctrl               | m            | na        | na        |
| 1      | skin         | Pemphigus vulgaris | m            | 949       | 143       |
| 2      | skin         | Pemphigus vulgaris | f            | 93        | 10        |
| 3      | skin         | Pemphigus vulgaris | f            | 141       | 861       |
| 4      | skin         | Pemphigus vulgaris | f            | 935       | 737       |
| 5      | skin         | Pemphigus vulgaris | f            | 178       | 3         |
| 6      | skin         | Pemphigus vulgaris | m            | 118       | <20       |
| 7      | skin         | Pemphigus vulgaris | m            | 118       | <20       |
| 1      | mucosa       | Ctrl               | m            | na        | na        |
| 2      | mucosa       | Ctrl               | f            | na        | na        |
| 3      | mucosa       | Ctrl               | f            | na        | na        |
| 4      | mucosa       | Ctrl               | f            | na        | na        |
| 5      | mucosa       | Ctrl               | m            | na        | na        |
| 1      | mucosa       | Pemphigus vulgaris | f            | 67        | <20       |
| 2      | mucosa       | Pemphigus vulgaris | f            | 1893      | 143       |
| 3      | mucosa       | Pemphigus vulgaris | m            | 224       | <20       |
| 4      | mucosa       | Pemphigus vulgaris | m            | 31        | <20       |
| 5      | mucosa       | Pemphigus vulgaris | m            | 556       | <20       |

**Supplementary Table 4:** Clinical and immunological profile of Ctrl and pemphigus vulgaris patients of skin and mucosa. Gender and levels of DSG1/DSG3 antibodies are displayed.

| Vector                            | Source               | Number   | Contributor                | Cloning sites | Insert sequence                                                                                                                                                                                                                                                                                                                                                                                                                                                                                                                                                                                                                                                                                                                                                                                                                                               |
|-----------------------------------|----------------------|----------|----------------------------|---------------|---------------------------------------------------------------------------------------------------------------------------------------------------------------------------------------------------------------------------------------------------------------------------------------------------------------------------------------------------------------------------------------------------------------------------------------------------------------------------------------------------------------------------------------------------------------------------------------------------------------------------------------------------------------------------------------------------------------------------------------------------------------------------------------------------------------------------------------------------------------|
| LentiCas9-Blast                   | Addgene              | 52962-LV | Feng Zhang                 |               |                                                                                                                                                                                                                                                                                                                                                                                                                                                                                                                                                                                                                                                                                                                                                                                                                                                               |
| psPAX2                            | Addgene              | 12259    | Didier Trono               |               |                                                                                                                                                                                                                                                                                                                                                                                                                                                                                                                                                                                                                                                                                                                                                                                                                                                               |
| pMD2.G                            | Addgene              | 12260    | Didier Trono               |               |                                                                                                                                                                                                                                                                                                                                                                                                                                                                                                                                                                                                                                                                                                                                                                                                                                                               |
| LentiCRISPR v2                    | Addgene              | 52961    | Addgene                    |               |                                                                                                                                                                                                                                                                                                                                                                                                                                                                                                                                                                                                                                                                                                                                                                                                                                                               |
| pGL4.10                           | Promega              | 9PIE665  | Wiebke Bechtel Walz        |               |                                                                                                                                                                                                                                                                                                                                                                                                                                                                                                                                                                                                                                                                                                                                                                                                                                                               |
| pGL4.10 DSG3 promoter             | Selfmade             |          |                            | Sac1, Hind3   | AACAGCAAGCAGGTTACCACACT<br>GGGAAAATGTCTTGAGTAATGAA<br>AAGAGCACCAGATAATCTACCTT<br>ATTAGGCACTAGGCTTTTTTGAA<br>AGTTATAAATGAAAAGAAATACAGT<br>ATAAAAGATGTCATTTGAGTATTAT<br>CAGAGTAATTTGCAACGCATTATT<br>TATATATTTCAAATATTCAAGGCAC<br>CATATAACTGTCAATTTTATTCT<br>TTTTTTTTTTTTTATCAAGCCTAC<br>ATTCATAGTGTCTAATGGGATGT<br>TTTTCTTCTCATATTTTAGTGCC<br>TTCAATAAATATATCATTGCTTA<br>ACATCTACATTTTGTAACTTTAG<br>ATCTACCACACATACTCAGGCTG<br>AAAAAATGCTCTTTTACAAGTTA<br>GATTTGGGGGATTTTACGCTTT<br>TGCTTTGCTTTTCGGTTTCATTGT<br>AACCATAGTCAACTAGATTAGCC<br>ATAAGACATCAACTGACAAAGT<br>GTAGTCCGGACTAGCTTTTGCAC<br>TCCACATCATGATTAATTTATTATT<br>CATCTGGTACCTTCTTAAACTT<br>TGCTTTAGCCTGTGAACCTTTCTT<br>TCAGCTTCCAACAAGGATTTTCAT<br>TGCTTTAGGAATCGAGGTGTGGCT<br>AAGTTTTTACCTGGGAGCAAGGT                                                                                              |
| pGL4.10 DSG2 promoter             | Selfmade             |          |                            | Sac1, Hind3   | GTGCGTTGGTCGCTATTAACCTCA<br>TTTGACAGATCTGGAACCTGGGGC<br>CCAGAGGGCTAGTCCAGGCCAC<br>TCAGCTAGTCACTCTTGAGCGGG<br>GGCCTCTGATCTAGCTAGTGGTGT<br>AATAGAATTTGAAATCATTTCAAA<br>GAATATATATATTCCGTAACACC<br>CTAGAGTTTTCTCTAGCCCAAGA<br>ATTGCTCTTTTACCTCTGTGTA<br>TTGTTCTCTTGAGCCAGATAAG<br>CTGCAAACTGTGGAAAGCACTGA<br>AGGGCCATAGGGAAGAGCAGCCT<br>TTGGGAGACAGCCACCTGAAATT<br>TGCTCCACAACCTCGCTCCAG<br>GAGAGCGGGCCGACGACCGCG<br>GTCCGACTTTCTGAGGACAGC<br>GGTCCCATGTCACTAGCAGACCC<br>TGCGCTCCGGCCCAAGCACA<br>TCAAAAGTGGGGACCTTTGGG<br>CGGTGCTGGGGCCCTGGCCCC<br>GCAGCACTGGGGCGGTTGGTCC<br>CGCAGGACTGCTCCGTGGAGC<br>TTTTGCTCTTGGGCGGGCCCT<br>GGACCCGCGCTACCCAGGTGCA<br>GCCCGCCAGGAGGCTCCCTCTC<br>CCCGCATTCTCCAGAGATAGG<br>GGGTGGGAAGGAGAGAACGGCG<br>GGCGGGGCTGCCACCACAGT<br>CCCCAACCAAGGACGTACGGT<br>CCAGGTGCGAGTGGAGCGGGC<br>GGGAGTCCACCCTGGCTCCCT<br>CCTCTGCTGAACCTCCACCTCTG |
| pGL4.73                           | Promega              | 9PIE691  | Wiebke Bechtel Walz        |               |                                                                                                                                                                                                                                                                                                                                                                                                                                                                                                                                                                                                                                                                                                                                                                                                                                                               |
| LentiCRISPR v2 sgNT               | Selfmade             |          |                            | Esp3I         | CTGAAAAGAAGGAGTTGA                                                                                                                                                                                                                                                                                                                                                                                                                                                                                                                                                                                                                                                                                                                                                                                                                                            |
| LentiCRISPR v2 sgKLF5 1           | Selfmade             |          |                            | Esp3I         | GGCTCTGATTTGTAGAAGT                                                                                                                                                                                                                                                                                                                                                                                                                                                                                                                                                                                                                                                                                                                                                                                                                                           |
| LentiCRISPR v2 sgKLF5 2           | Selfmade             |          |                            | Esp3I         | GTCTTGATGTGTGTTACGCA                                                                                                                                                                                                                                                                                                                                                                                                                                                                                                                                                                                                                                                                                                                                                                                                                                          |
| LentiCRISPR v2 sgHDAC3 1          | Selfmade             |          |                            | Esp3I         | TGGGTC AATGCCAGCCGATG                                                                                                                                                                                                                                                                                                                                                                                                                                                                                                                                                                                                                                                                                                                                                                                                                                         |
| LentiCRISPR v2 sgHDAC3 2          | Selfmade             |          |                            | Esp3I         | ACCTGGAGCACAATGCACGT                                                                                                                                                                                                                                                                                                                                                                                                                                                                                                                                                                                                                                                                                                                                                                                                                                          |
| LentiCRISPR v2 sgDSG3             | Selfmade             |          |                            | Esp3I         | AGAGAAACCACTATACTAA                                                                                                                                                                                                                                                                                                                                                                                                                                                                                                                                                                                                                                                                                                                                                                                                                                           |
| LentiCRISPR v2 sgRAPGEF1          | Selfmade             |          |                            | Esp3I         | ATGTTGACTGT TACGCACAG                                                                                                                                                                                                                                                                                                                                                                                                                                                                                                                                                                                                                                                                                                                                                                                                                                         |
| LentiCRISPR v2 sgADAR             | Selfmade             |          |                            | Esp3I         | GTGCATACACTCAAGCAGTG                                                                                                                                                                                                                                                                                                                                                                                                                                                                                                                                                                                                                                                                                                                                                                                                                                          |
| LentiCRISPR v2 sgAP2S1            | Selfmade             |          |                            | Esp3I         | GGCCATTCACAACTTCGTGG                                                                                                                                                                                                                                                                                                                                                                                                                                                                                                                                                                                                                                                                                                                                                                                                                                          |
| LentiCRISPR v2 sgAP3B1            | Selfmade             |          |                            | Esp3I         | ACATGCTAACTCGATATGCT                                                                                                                                                                                                                                                                                                                                                                                                                                                                                                                                                                                                                                                                                                                                                                                                                                          |
| LentiCRISPR v2 sgEGFR             | Selfmade             |          |                            | Esp3I         | GTCTGCGTACTTCCAGACCA                                                                                                                                                                                                                                                                                                                                                                                                                                                                                                                                                                                                                                                                                                                                                                                                                                          |
| LentiCRISPR v2 sgPDK1             | Selfmade             |          |                            | Esp3I         | GTCTCTCGAGTCCGTCCAGT                                                                                                                                                                                                                                                                                                                                                                                                                                                                                                                                                                                                                                                                                                                                                                                                                                          |
| LentiCRISPR v2 sgRBPJ             | Selfmade             |          |                            | Esp3I         | CATTGCCTCAGGAACAAGG                                                                                                                                                                                                                                                                                                                                                                                                                                                                                                                                                                                                                                                                                                                                                                                                                                           |
| pLenti C mGFP                     | OriGene Technologies | PS100071 |                            |               |                                                                                                                                                                                                                                                                                                                                                                                                                                                                                                                                                                                                                                                                                                                                                                                                                                                               |
| pLenti HDAC3 C mGFP               | Selfmade             |          |                            | Selfmade      | ORF NM_003883 w/o STOP                                                                                                                                                                                                                                                                                                                                                                                                                                                                                                                                                                                                                                                                                                                                                                                                                                        |
| pLenti KLF5 C mGFP                | Selfmade             |          |                            | Selfmade      | ORF NM_001730 w/o STOP                                                                                                                                                                                                                                                                                                                                                                                                                                                                                                                                                                                                                                                                                                                                                                                                                                        |
| EF1a-hKLF5-P2A-HyqR-Barcode       | Addgene              | 120491   |                            |               |                                                                                                                                                                                                                                                                                                                                                                                                                                                                                                                                                                                                                                                                                                                                                                                                                                                               |
| pKLV2-U6gRNA5(qGFP)-PGKBFP2AGFP-W | Addgene              | 67980    | Kosuke Yusa                |               |                                                                                                                                                                                                                                                                                                                                                                                                                                                                                                                                                                                                                                                                                                                                                                                                                                                               |
| LentiGuide-Puro                   | Addgene              | 73178-LV | David Root and John Doench |               |                                                                                                                                                                                                                                                                                                                                                                                                                                                                                                                                                                                                                                                                                                                                                                                                                                                               |

| Target                          | Purpose           | Sequence forward                      | Sequence reverse                       |
|---------------------------------|-------------------|---------------------------------------|----------------------------------------|
| GAPDH                           | qRT-PCR           | GAC AACAGCCTCAAGATCATCAG              | GAGT CCTTCCACGATACCAAAGT               |
| KLF5 1                          | qRT-PCR           | GAATCCGGCCCGCGAC                      | CTGGAGAAAGCTGAGGTGTC                   |
| KLF5 2                          | qRT-PCR           | CCGCGAATCCGGCCC                       | TGGAGGAAGCTGAGGTGTC                    |
| KLF5 3                          | qRT-PCR           | AATCCGGCCCGCGAC                       | GGAAGTGGAGGAAGCTGAGG                   |
| KLF5 4                          | qRT-PCR           | GCGAATCCGGCCCGC                       | ACTGGAGGAAGCTGAGGTGT                   |
| HDAC3                           | qRT-PCR           | AGTCAGCCCAACAATATGC                   | TGTGTAAAGCGAGCAGAACT                   |
| DSG3                            | qRT-PCR           | CCCAGTTCCTGATGGCTCAGA                 | AAATCGGCTCCATTGGCTGTT                  |
| DSG3 promoter 1                 | ChIP-qPCR         | AAGGCATGAAGAAGCTCACATTGC              | TGCATGGGT CACACGGAAATA                 |
| DSG3 promoter 2                 | ChIP-qPCR         | TCCGACTAGCTTTTGCAC                    | GCTTGATCACCTTTGCTCC                    |
| DSG3 promoter 3                 | ChIP-qPCR         | TAACCATCTAACGAGGGCCAC                 | GCTACTGTTATGCCACCAAAAG                 |
| DSG3 promoter 4                 | ChIP-qPCR         | TTCAAGGCACCATATAACTGTTCAA             | CAGCCTGAGTATGTGGGTAG                   |
| DSG3 promoter 5                 | ChIP-qPCR         | ACCTTATTAGGCACTAGGCTT                 | TGCCTTGCAAAATTAAGTCTGAT                |
| KLF5 promoter                   | ChIP-qPCR         | AAGGCATGAAGAAGCTCACATTGC              | TGCATGGGT CACACGGAAATA                 |
| GAPDH promoter                  | ChIP-qPCR         | CACAGTCCAGTCTGGGAAC                   | TAGTAGCCGGCCCTACTTT                    |
| CTNNB1 promoter                 | ChIP-qPCR         | CCCGGGGACTACTTTCCAC                   | TTATAAGTCCGCGAAGACCGG                  |
| DSG2 promoter                   | Cloning           | CGCCGCGCGCCGCTGCGTTG<br>GTCGCTATAACT  | CGCGGCTCGAGGCGCTTTTACA<br>GAGGTGGG     |
| DSG3 promoter                   | Cloning           | CGCCGCGCGCCCAACAGCAAG<br>CAGGTTCCACCA | CGCGGCTCGAGGCTTGATCACC<br>TTTGCTCC     |
| HDAC3 ORF NM_003883             | Cloning           | CGCCGCGCGCCCATGGCCAAAG<br>ACCGTGGC    | CGCGGCTCGAGAAATCTCCACATC<br>GCTTTCCCTG |
| Negative Ctrl Promoter pulldown | Promoter pulldown | 5' Bio GGGGCAAGAAGTTGCCAT             | TGAGAGTGACCATAGGGGA                    |
| DSG2 promoter                   | Promoter pulldown | 5' Bio GTGCGTTGGTCGCTATAACT           | GCCGCTTTTACAGAGGTGGG                   |
| DSG3 promoter                   | Promoter pulldown | 5' Bio AACAGCAAGCAGGTTACCA            | GCTTGATCACCTTTGCTCC                    |
| KLF5 ORF NM_001730              | Cloning           | CGCCGCGCGCCCATGGCTACA<br>AGGTTGCTGAGC | TACAGCCTCGAGTTCTGGTGCCT<br>CTTCATGCAGG |
| KLF5 K369A                      | Mutagenesis       | CGATTTGGAGGACGACGCATC                 | GGGTACTCTTCTATTG                       |
| KLF5 K391A                      | Mutagenesis       | TTCTCATTTAGCAGCTCACCTGAG              | GACTTGGTATAAATTTTGTG                   |

|             |                             |                                                                                                         |  |
|-------------|-----------------------------|---------------------------------------------------------------------------------------------------------|--|
| NGS_P5 nt0  | Illumina library sequencing | AATGATACGGCGACCACCGAGATC<br>TACACTCTTTCCCTACACGACGCT<br>CTTCCGATCTTTGTGAAAGGACG<br>AAACACC*G            |  |
| NGS_P5 nt1  | Illumina library sequencing | AATGATACGGCGACCACCGAGATC<br>TACACTCTTTCCCTACACGACGCT<br>CTTCCGATCTTTGTGAAAGGAC<br>GAAACACC*G            |  |
| NGS_P5 nt2  | Illumina library sequencing | AATGATACGGCGACCACCGAGATC<br>TACACTCTTTCCCTACACGACGCT<br>CTTCCGATCTGCTTTGTGAAAGGA<br>CGAAACACC*G         |  |
| NGS_P5 nt3  | Illumina library sequencing | AATGATACGGCGACCACCGAGATC<br>TACACTCTTTCCCTACACGACGCT<br>CTTCCGATCTAGCTTTGTGAAAGG<br>ACGAAACACC*G        |  |
| NGS_P5 nt4  | Illumina library sequencing | AATGATACGGCGACCACCGAGATC<br>TACACTCTTTCCCTACACGACGCT<br>CTTCCGATCTCAACTTTGTGAAAG<br>GACGAAACACC*G       |  |
| NGS_P5 nt6  | Illumina library sequencing | AATGATACGGCGACCACCGAGATC<br>TACACTCTTTCCCTACACGACGCT<br>CTTCCGATCTTGACCTTTGTGAA<br>AGGACGAAACACC*G      |  |
| NGS_P5 nt7  | Illumina library sequencing | AATGATACGGCGACCACCGAGATC<br>TACACTCTTTCCCTACACGACGCT<br>CTTCCGATCTACGCAACTTTGTGA<br>AAGGACGAAACACC*G    |  |
| NGS_P7_N701 | Illumina library sequencing | CAAGCAGAAGACGGCATAACGAGAT<br>TCGCCTTAGTGACTGGAGTTCAGA<br>CGGTGTGCTCTCCGATCTTCTACT<br>ATTCTTTCCCTGCAGT*G |  |
| NGS_P7_N702 | Illumina library sequencing | CAAGCAGAAGACGGCATAACGAGAT<br>CTAGTACGGTGACTGGAGTTCAGA<br>CGGTGTGCTCTCCGATCTTCTACT<br>ATTCTTTCCCTGCAGT*G |  |
| NGS_P7_N703 | Illumina library sequencing | CAAGCAGAAGACGGCATAACGAGAT<br>TTCTGCCTGTGACTGGAGTTCAGA<br>CGGTGTGCTCTCCGATCTTCTACT<br>ATTCTTTCCCTGCAGT*G |  |
| NGS_P7_N704 | Illumina library sequencing | CAAGCAGAAGACGGCATAACGAGAT<br>GCTCAGGAGTGACTGGAGTTCAG<br>ACGTGTGCTCTCCGATCTTCTAC<br>TATTCTTTCCCTGCAGT*G  |  |
| NGS_P7_N705 | Illumina library sequencing | CAAGCAGAAGACGGCATAACGAGAT<br>AGGAGTCCGTGACTGGAGTTCAG<br>ACGTGTGCTCTCCGATCTTCTAC<br>TATTCTTTCCCTGCAGT*G  |  |
| NGS_P7_N706 | Illumina library sequencing | CAAGCAGAAGACGGCATAACGAGAT<br>CATGCCTAGTGACTGGAGTTCAGA<br>CGGTGTGCTCTCCGATCTTCTACT<br>ATTCTTTCCCTGCAGT*G |  |
| NGS_P7_N707 | Illumina library sequencing | CAAGCAGAAGACGGCATAACGAGAT<br>GTAGAGAGTGACTGGAGTTCAG<br>ACGTGTGCTCTCCGATCTTCTAC<br>TATTCTTTCCCTGCAGT*G   |  |
| NGS_P7_N710 | Illumina library sequencing | CAAGCAGAAGACGGCATAACGAGAT<br>CAGCCTCGGTGACTGGAGTTCAG<br>ACGTGTGCTCTCCGATCTTCTAC<br>TATTCTTTCCCTGCAGT*G  |  |
| NGS_P7_N711 | Illumina library sequencing | CAAGCAGAAGACGGCATAACGAGAT<br>TGCCCTTTGTGACTGGAGTTCAGA<br>CGGTGTGCTCTCCGATCTTCTACT<br>ATTCTTTCCCTGCAGT*G |  |
| NGS_P7_N712 | Illumina library sequencing | CAAGCAGAAGACGGCATAACGAGAT<br>TCCTTACGTGACTGGAGTTCAGA<br>CGGTGTGCTCTCCGATCTTCTACT<br>ATTCTTTCCCTGCAGT*G  |  |
| NGS_P7_N714 | Illumina library sequencing | CAAGCAGAAGACGGCATAACGAGAT<br>TCATGAGCGTGACTGGAGTTCAGA<br>CGGTGTGCTCTCCGATCTTCTACT<br>ATTCTTTCCCTGCAGT*G |  |
| NGS_P7_N715 | Illumina library sequencing | CAAGCAGAAGACGGCATAACGAGAT<br>CCTGAGATGTGACTGGAGTTCAGA<br>CGGTGTGCTCTCCGATCTTCTACT<br>ATTCTTTCCCTGCAGT*G |  |

**Supplementary Table 5:** List of used plasmids with source, number and contributor and primer sequences used for qRT-PCR, ChIP-qPCR, cloning, promoter pulldown, mutagenesis and library sequencing.

| Figure  | Supplement | Finding                                                                                                                                                                                                                       |
|---------|------------|-------------------------------------------------------------------------------------------------------------------------------------------------------------------------------------------------------------------------------|
| 1a-b    |            | CRISPR/Cas9 screen suggests KLF5 and 55 other proteins as positive regulators of DSG3 in the membrane.                                                                                                                        |
|         | Supp 1a-g  | Validation of CRISPR/Cas9 screen-identified candidates.                                                                                                                                                                       |
| 1c-d    |            | Pulldown of the DSG3 promoter followed by quantitative mass spectrometry revealed proteins that bind directly to the DSG3 promoter.                                                                                           |
| 1e      |            | Overlap of both screens identified KLF5 as a candidate.                                                                                                                                                                       |
|         | Supp 2a-b  | Pulldown of the DSG2 promoter followed by quantitative mass spectrometry did not identify KLF5.                                                                                                                               |
|         | Supp 2c-d  | KLF5 binds to the DSG3 promoter.                                                                                                                                                                                              |
| 2a-e    |            | Validation of KLF5 as regulator of DSG3 and adhesion in HaCaT cells.                                                                                                                                                          |
|         | Supp 3a-b  | Validation of KLF5 as regulator of DSG3 and adhesion in NHEK cells.                                                                                                                                                           |
| 2f-g    |            | Overexpression of KLF5 increases DSG3 levels and adhesion                                                                                                                                                                     |
| 3a-b    |            | KLF5 levels are reduced in PV patient skin.                                                                                                                                                                                   |
|         | Supp 4a-b  | PV-IgG and pX4_3 bind to the cell membrane in HaCaT cells.                                                                                                                                                                    |
| 3c      |            | PV-IgG treatment reduces KLF5 and DSG3 protein levels in HaCaTs and NHEKs.                                                                                                                                                    |
| 3d      | Supp 4d-e  | Overexpression of KLF5 prevents PV-IgG-induced DSG3 reduction.                                                                                                                                                                |
| 3e-f    |            | PV-IgG treatment increases HDAC3 protein levels and HDAC3 activity.                                                                                                                                                           |
| 3g-h    |            | HDAC3 levels are increased in PV patients in skin.                                                                                                                                                                            |
| 4a      | Supp 4f    | KLF5 is acetylated in HaCaT cells, but PV-IgG treatment did not alter KLF5 acetylation levels.                                                                                                                                |
|         | Supp 5a-b  | HDAC3 overexpression increases HDAC3 activity and reduces cell-cell adhesion.                                                                                                                                                 |
|         | Supp 5d-e  | But also HDAC3 depletion reduces DSG3 protein levels and also cell-cell adhesion. Therefore a correct HDAC3 balance is needed for normal cohesion.                                                                            |
|         | Supp 6a    | KLF5 lysine mutants do not rescue the PV-IgG-induced loss of cell-cell adhesion.                                                                                                                                              |
| 4b      |            | PV-IgG treatment reduces KLF5 mRNA levels.                                                                                                                                                                                    |
| 4d-e    |            | PV-IgG did not induce KLF5 reduction in HDAC3 depleted cells.                                                                                                                                                                 |
| 4f-g    |            | HDAC3 binds to the KLF5 promoter, which is increased by PV-IgG.                                                                                                                                                               |
|         | Supp 6b    | HDAC3 binds to the KLF5 promoter in a published data set.                                                                                                                                                                     |
| 4h      |            | p38MAPK is regulating HDAC3 levels.                                                                                                                                                                                           |
| 5a-b, d |            | Titration of the inhibitor of HDAC3, RGFP966, in HaCaT cells incubated with PV-IgG restored cell adhesion, DSG3 levels and DSG3 localization at the membrane.                                                                 |
| 5c      |            | RGFP966 increases DSG3 promoter activity in PV-IgG-treated HaCaT cells.                                                                                                                                                       |
|         | Supp 6c-d  | DSG3 depletion does not influence HDAC3 or KLF5 levels. HDAC inhibition does not alter DSG1/2, and DSP content.                                                                                                               |
|         | Supp 7a-d  | Titration of the HDAC1/3 inhibitor of HDAC3, Entinostat, or the HDAC3 inhibitor, RGFP966, to HaCaT cells incubated with PV-IgG or pX4_3, also restored cell adhesion. RGFP966 also restored cell-cell-adhesion in NHEK cells. |
|         | Supp 7e    | Depletion of KLF5 prevented the protective effect of the HDAC3 inhibitors RGFP966 or Entinostat in PV-IgG-treated HaCaT cells.                                                                                                |
|         | Supp 7f    | Depletion of HDAC3 prevented the PV-IgG-mediated loss of cell-cell adhesion.                                                                                                                                                  |
|         | Supp 7g    | Depletion of KLF5 prevented rescue of DSG3 protein levels in PV-IgG HaCaT cells by HDAC3 inhibitors RGFP966 or Entinostat.                                                                                                    |
|         | Supp 8     | Titration of the inhibitor of HDAC3, RGFP966, to HaCaT cells incubated with PV-IgG, restored DSG3 levels at the membrane in NHEK cells.                                                                                       |
| 6a-d    |            | RGFP966 or Entinostat treatment prevented pX4_3 induced blistering in a neonatal PV mouse model and in human ex-vivo PV skin models.                                                                                          |
|         | Supp 9a-b  | pX4_3 binds to the membrane of keratinocytes in human and mouse skin.                                                                                                                                                         |
|         | Supp 9c-d  | pX4_3 induces HDAC3 increase in the human ex-vivo skin model.                                                                                                                                                                 |
|         | Supp 9e    | Injection of RGFP966 inhibitor two h after pX4_3 injection also prevents blistering in the ex-vivo human skin model.                                                                                                          |
| 6e      |            | pX4_3 reduces KLF5 levels in the ex vivo human skin model, which is prevented by the HDAC3 inhibitors RGFP966 or Entinostat.                                                                                                  |
|         | Supp 10a-b | pX4_3 reduces DSG3 levels in the ex vivo human skin model, which is ameliorated by the HDAC3 inhibitors RGFP966 or Entinostat.                                                                                                |
|         | Supp 10c-d | Treatment with RGFP966 or Entinostat prevented pX4_3-induced blister formation in human ex vivo mucosal models.                                                                                                               |
| 6g      |            | Graphical summary                                                                                                                                                                                                             |

**Supplementary Table 6:** Summary of results for all Figures and Supplementary Figures.
